# Supplementary material for: Hirundigenin type C21 steroidal glycosides from Cynanchum stauntonii and their anti-inflammatory activity
Source: Royal Society of Chemistry journal article supplement (doi:10.1039/c6ra11957c), 2016-01-01
Supplement: c6ra11957c1.pdf [file c6ra11957c1.pdf]

## Supporting Information

### **Hirundigenin type C<sub>21</sub> steroidal glycosides from *Cynanchum stauntonii* and their anti-inflammatory activity**

Chang-zhi Lai<sup>a,#</sup>, Hai-bin Liu<sup>b,#</sup>, Jian-xin Liu<sup>c,d</sup>, Qin Ouyang<sup>e</sup>, Shu-wen Pang<sup>a</sup>, Hua Zhou<sup>c</sup>, Hai-yan Tian<sup>a</sup>, Liang Liu<sup>c</sup>, Xin-sheng Yao<sup>a,\*</sup>, and Jin-shan Tang<sup>a,\*</sup>

<sup>a</sup> Institutes of Traditional Chinese Medicine and Natural Products, College of Pharmacy, Jinan University, Guangzhou 510632, P. R. China. Email: [tyaoxs@jnu.edu.cn](mailto:tyaoxs@jnu.edu.cn); [gztangjinshan@126.com](mailto:gztangjinshan@126.com); Fax: +86-20-85221559; Tel: +86-20-85220785.

<sup>b</sup> Guangdong Lewwin Pharmaceutical Research Institute CO., Ltd, Guangzhou, P. R. China;

<sup>c</sup> State Key Laboratory of Quality Research in Chinese Medicine, Macau University of Science and Technology, Avenida Wai Long, Taipa, Macau, P. R. China;

<sup>d</sup> College of Pharmacy, Hunan University of Medicine, Huaihua 418000, P. R. China;

<sup>e</sup> School of Pharmacy, The Third Military Medical University, Chongqing, 400038, PR China.

<sup>#</sup> contributed equally to this work

## The List of Cotents

| NO         | Cotent                                                             |
|------------|--------------------------------------------------------------------|
| Figure S1  | <sup>1</sup> H NMR spectrum of compound <b>1</b>                   |
| Figure S2  | <sup>13</sup> C NMR spectrum of compound <b>1</b>                  |
| Figure S3  | <sup>1</sup> H- <sup>1</sup> H COSY spectrum of compound <b>1</b>  |
| Figure S4  | HSQC spectrum of compound <b>1</b>                                 |
| Figure S5  | HMBC spectrum of compound <b>1</b>                                 |
| Figure S6  | ROESY spectrum of compound <b>1</b>                                |
| Figure S7  | <sup>1</sup> H NMR spectrum of compound <b>2</b>                   |
| Figure S8  | <sup>13</sup> C NMR spectrum of compound <b>2</b>                  |
| Figure S9  | <sup>1</sup> H- <sup>1</sup> H COSY spectrum of compound <b>2</b>  |
| Figure S10 | HSQC spectrum of compound <b>2</b>                                 |
| Figure S11 | HMBC spectrum of compound <b>2</b>                                 |
| Figure S12 | ROESY spectrum of compound <b>2</b>                                |
| Figure S13 | <sup>1</sup> H NMR spectrum of compound <b>3</b>                   |
| Figure S14 | <sup>13</sup> C NMR spectrum of compound <b>3</b>                  |
| Figure S15 | <sup>1</sup> H- <sup>1</sup> H COSY spectrum of compound <b>3</b>  |
| Figure S16 | HSQC spectrum of compound <b>3</b>                                 |
| Figure S17 | HMBC spectrum of compound <b>3</b>                                 |
| Figure S18 | ROESY spectrum of compound <b>3</b>                                |
| Figure S19 | <sup>1</sup> H NMR spectrum of compound <b>4</b>                   |
| Figure S20 | <sup>13</sup> C NMR spectrum of compound <b>4</b>                  |
| Figure S21 | <sup>1</sup> H- <sup>1</sup> H COSY spectrum of compound <b>4</b>  |
| Figure S22 | HSQC spectrum of compound <b>4</b>                                 |
| Figure S23 | HMBC spectrum of compound <b>4</b>                                 |
| Figure S24 | ROESY spectrum of compound <b>4</b>                                |
| Figure S25 | <sup>1</sup> H NMR spectrum of compound <b>5</b>                   |
| Figure S26 | <sup>13</sup> C NMR spectrum of compound <b>5</b>                  |
| Figure S27 | <sup>1</sup> H- <sup>1</sup> H COSY spectrum of compound <b>5</b>  |
| Figure S28 | HSQC spectrum of compound <b>5</b>                                 |
| Figure S29 | HMBC spectrum of compound <b>5</b>                                 |
| Figure S30 | <sup>1</sup> H NMR spectrum of compound <b>6</b>                   |
| Figure S31 | <sup>13</sup> C NMR spectrum of compound <b>6</b>                  |
| Figure S32 | <sup>1</sup> H- <sup>1</sup> H COSY spectrum of compound <b>6</b>  |
| Figure S33 | HSQC spectrum of compound <b>6</b>                                 |
| Figure S34 | HMBC spectrum of compound <b>6</b>                                 |
| Figure S35 | ROESY spectrum of compound <b>6</b>                                |
| Figure S36 | <sup>1</sup> H NMR spectrum of compound <b>2a</b>                  |
| Figure S37 | <sup>13</sup> C NMR spectrum of compound <b>2a</b>                 |
| Figure S38 | <sup>1</sup> H- <sup>1</sup> H COSY spectrum of compound <b>2a</b> |
| Figure S39 | HSQC spectrum of compound <b>2a</b>                                |

|            |                                                                               |
|------------|-------------------------------------------------------------------------------|
| Figure S40 | HMBC spectrum of compound <b>2a</b>                                           |
| Figure S41 | <sup>1</sup> H NMR spectrum of compound <b>2b</b>                             |
| Figure S42 | <sup>13</sup> C NMR spectrum of compound <b>2b</b>                            |
| Figure S43 | <sup>1</sup> H- <sup>1</sup> H COSY spectrum of compound <b>2b</b>            |
| Figure S44 | HSQC spectrum of compound <b>2b</b>                                           |
| Figure S45 | HMBC spectrum of compound <b>2b</b>                                           |
| Figure S46 | <sup>1</sup> H NMR spectrum of compound <b>2d</b>                             |
| Figure S47 | <sup>13</sup> C NMR spectrum of compound <b>2d</b>                            |
| Figure S48 | <sup>1</sup> H NMR spectrum of compound <b>2e</b>                             |
| Figure S49 | <sup>13</sup> C NMR spectrum of compound <b>2e</b>                            |
| Figure S50 | <sup>1</sup> H NMR spectrum of compound <b>2f</b>                             |
| Figure S51 | <sup>13</sup> C NMR spectrum of compound <b>2f</b>                            |
| Figure S52 | <sup>1</sup> H NMR spectrum of compound <b>6a</b>                             |
| Figure S53 | <sup>13</sup> C NMR spectrum of compound <b>6a</b>                            |
| Figure S54 | <sup>1</sup> H- <sup>1</sup> H COSY spectrum of compound <b>6a</b>            |
| Figure S55 | HSQC spectrum of compound <b>6a</b>                                           |
| Figure S56 | HMBC spectrum of compound <b>6a</b>                                           |
| Figure S57 | <sup>1</sup> H NMR spectrum of compound <b>6b</b>                             |
| Figure S58 | <sup>13</sup> C NMR spectrum of compound <b>6b</b>                            |
| Figure S59 | <sup>1</sup> H- <sup>1</sup> H COSY spectrum of compound <b>6b</b>            |
| Figure S60 | HSQC spectrum of compound <b>6b</b>                                           |
| Figure S61 | HMBC spectrum of compound <b>6b</b>                                           |
| Figure S62 | <sup>1</sup> H NMR spectrum of compound <b>6d</b>                             |
| Figure S63 | <sup>13</sup> C NMR spectrum of compound <b>6d</b>                            |
| Figure S64 | <sup>1</sup> H NMR spectrum of compound <b>6e</b>                             |
| Figure S65 | <sup>13</sup> C NMR spectrum of compound <b>6e</b>                            |
| Figure S66 | <sup>1</sup> H NMR spectrum of compound <b>6f</b>                             |
| Figure S67 | <sup>13</sup> C NMR spectrum of compound <b>6f</b>                            |
| Table S1   | <sup>1</sup> H NMR data for the aglycone part of compounds <b>2a-2f,6a-6f</b> |
| Table S2   | <sup>1</sup> H NMR data for the sugar chains of compounds <b>2a-2f,6a-6f</b>  |
| Table S3   | <sup>13</sup> C NMR data for compounds <b>2a-2f,6a-6f</b>                     |

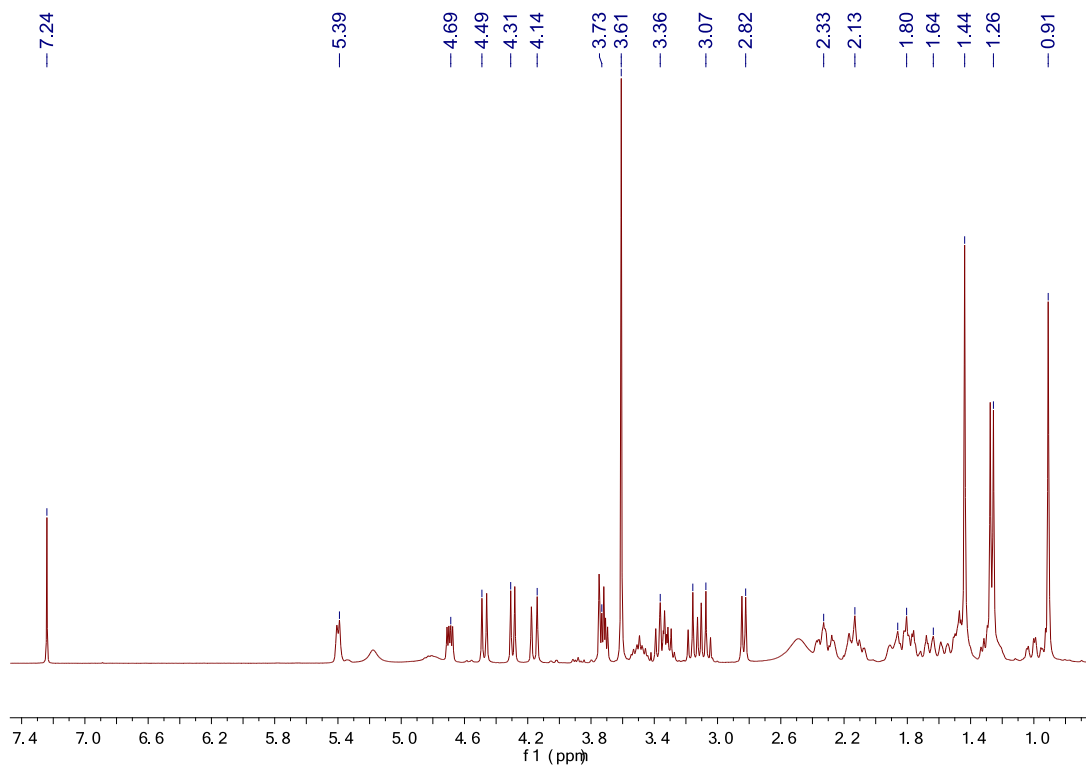

Figure S1  $^1\text{H}$  NMR spectrum of compound **1**

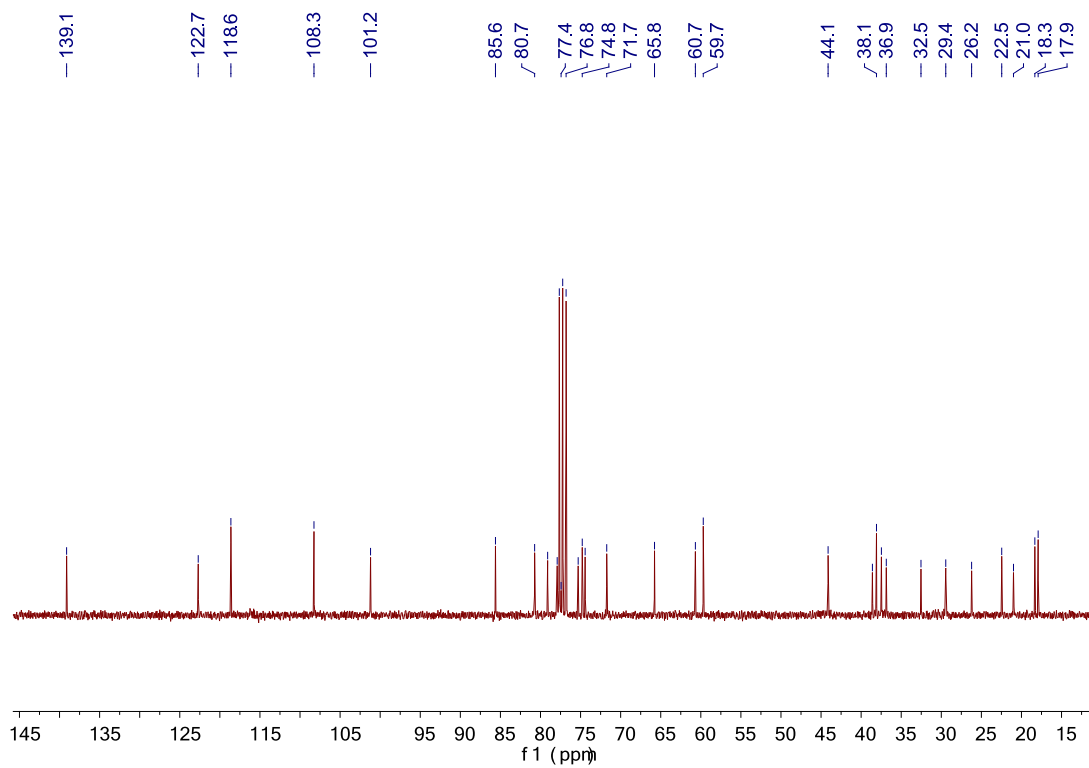

Figure S2  $^{13}\text{C}$  NMR spectrum of compound **1**

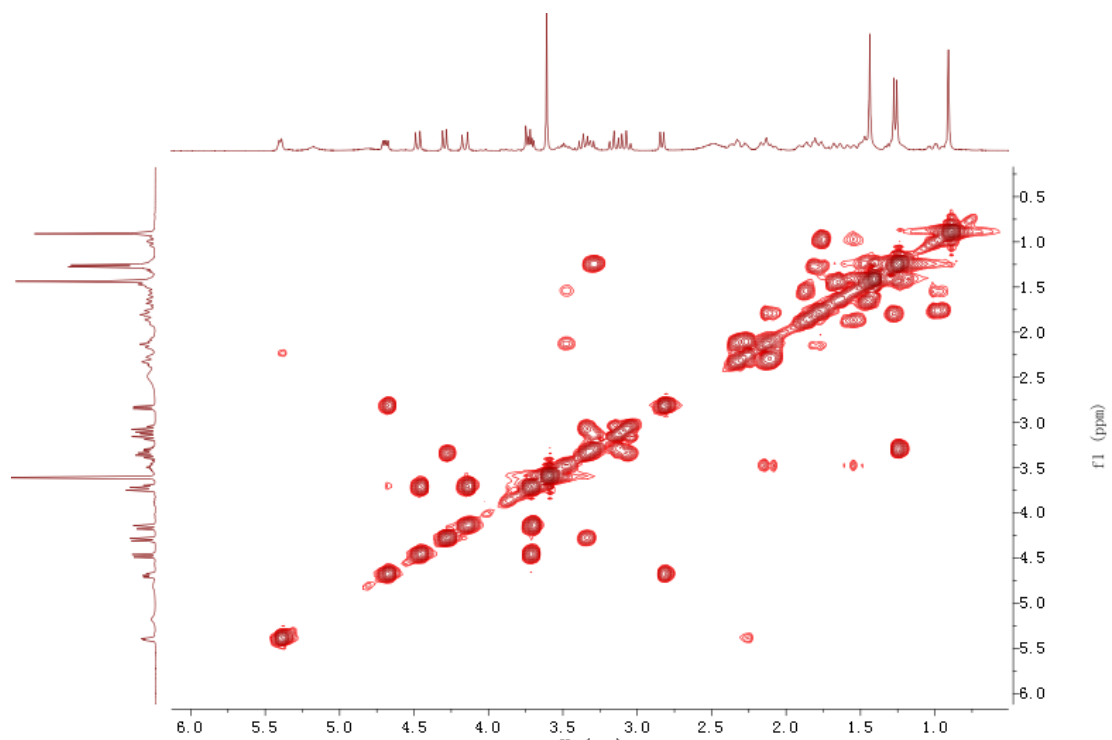

Figure S3  $^1\text{H}$ - $^1\text{H}$  COSY spectrum of compound **1**

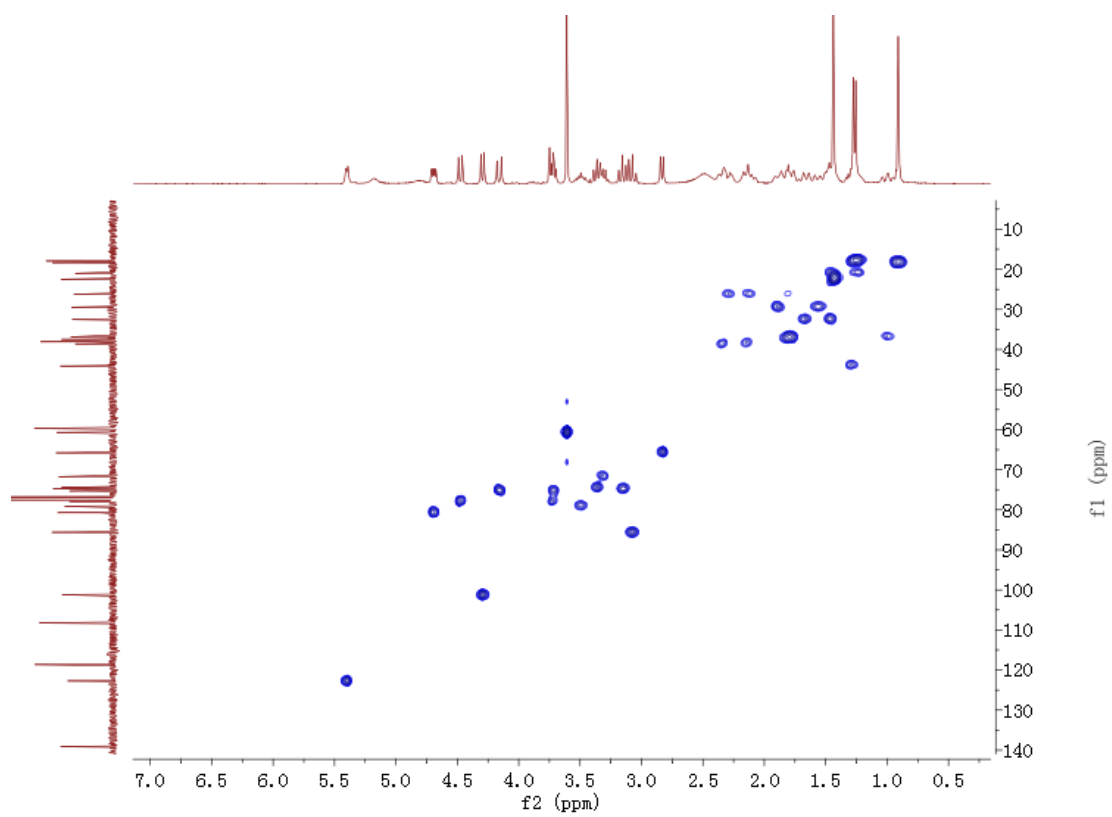

Figure S4 HSQC spectrum of compound **1**

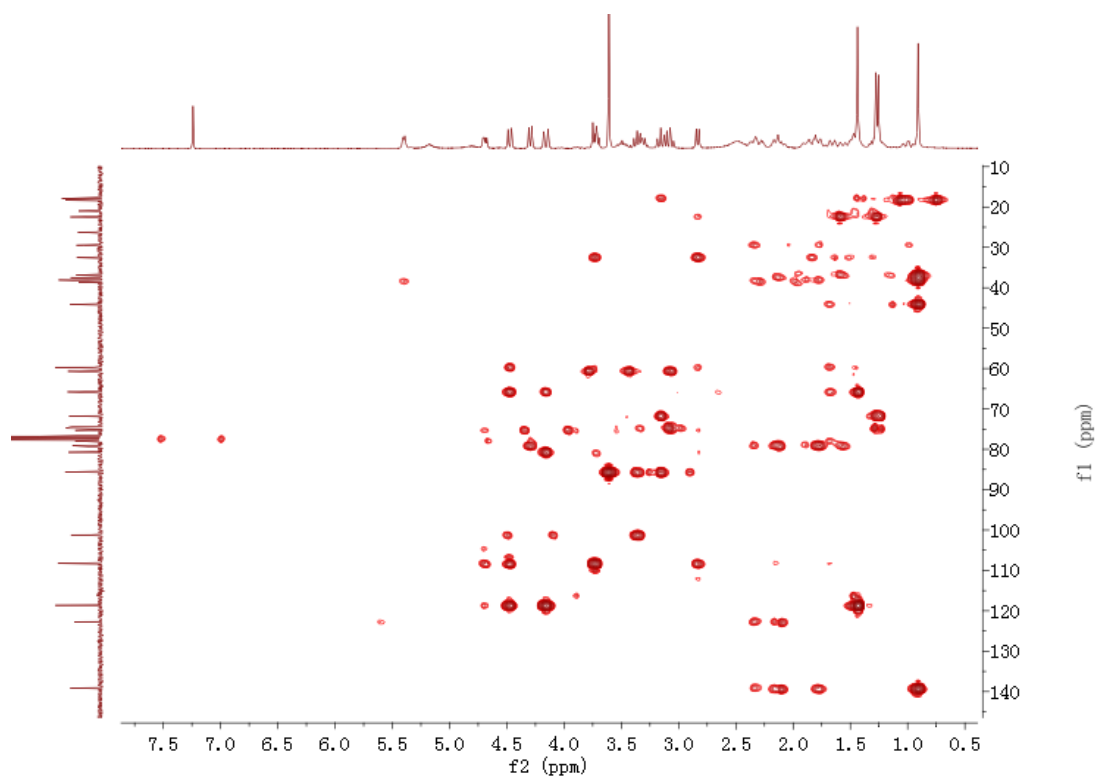

Figure S5 HMBC spectrum of compound **1**

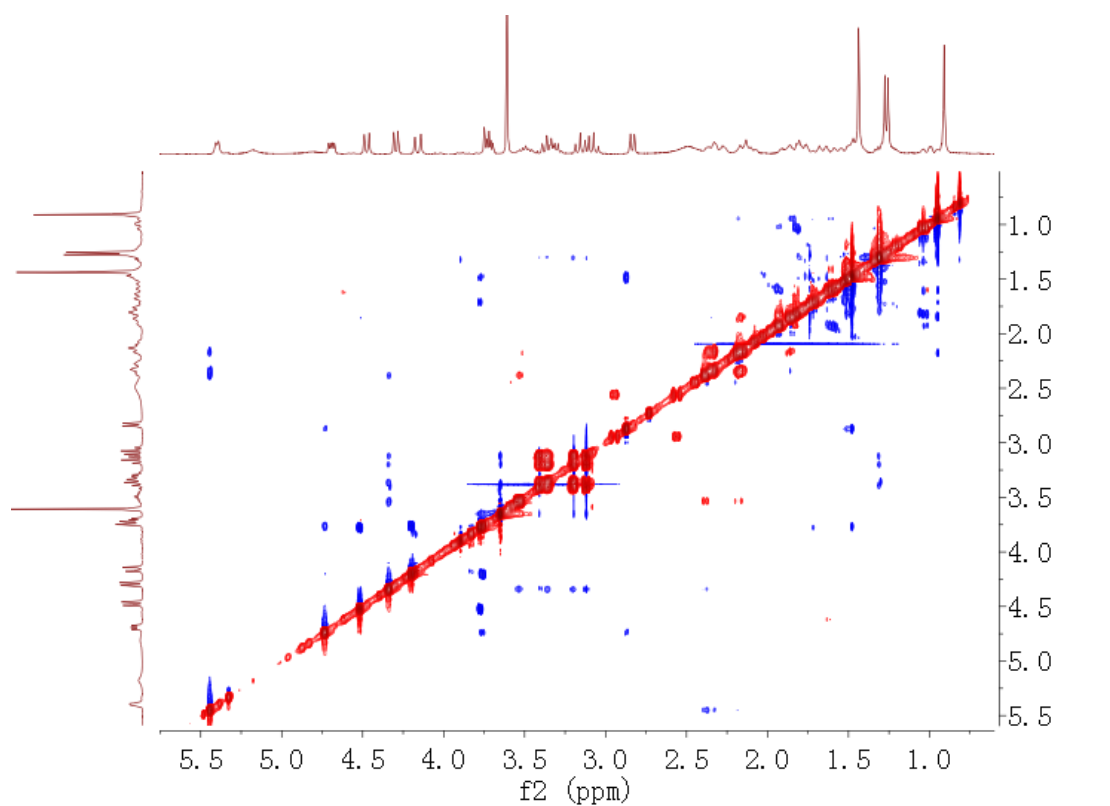

Figure S6 ROESY spectrum of compound **1**

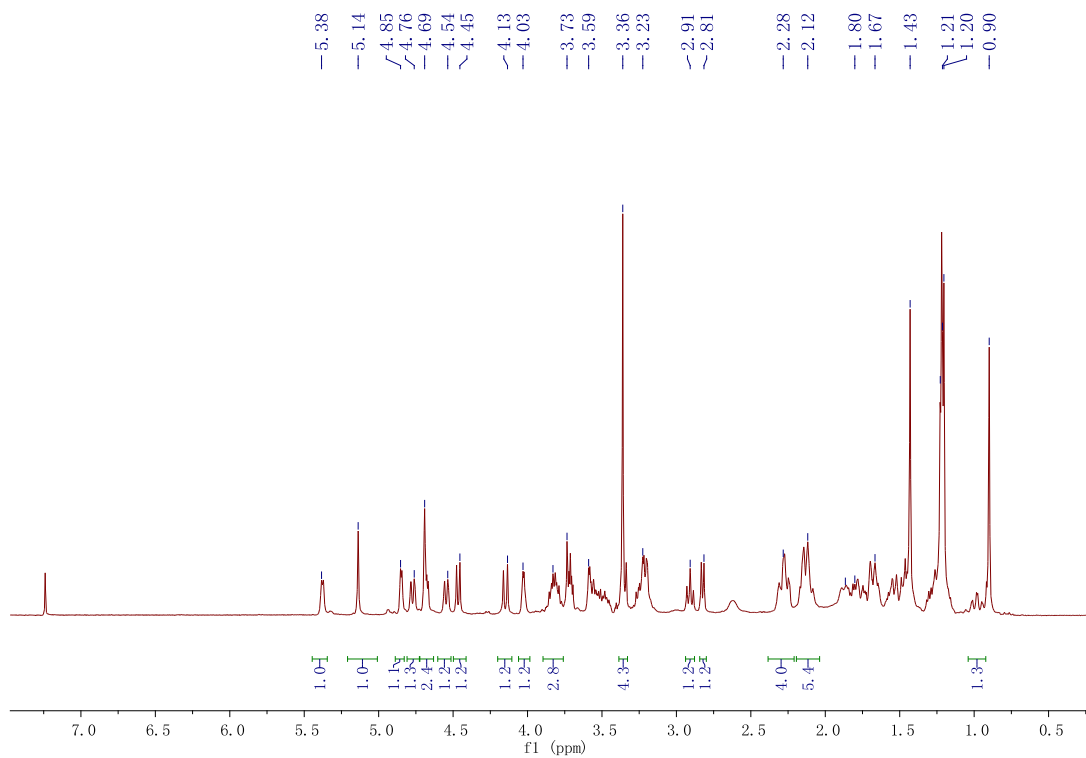

Figure S7  $^1\text{H}$  NMR spectrum of compound **2**

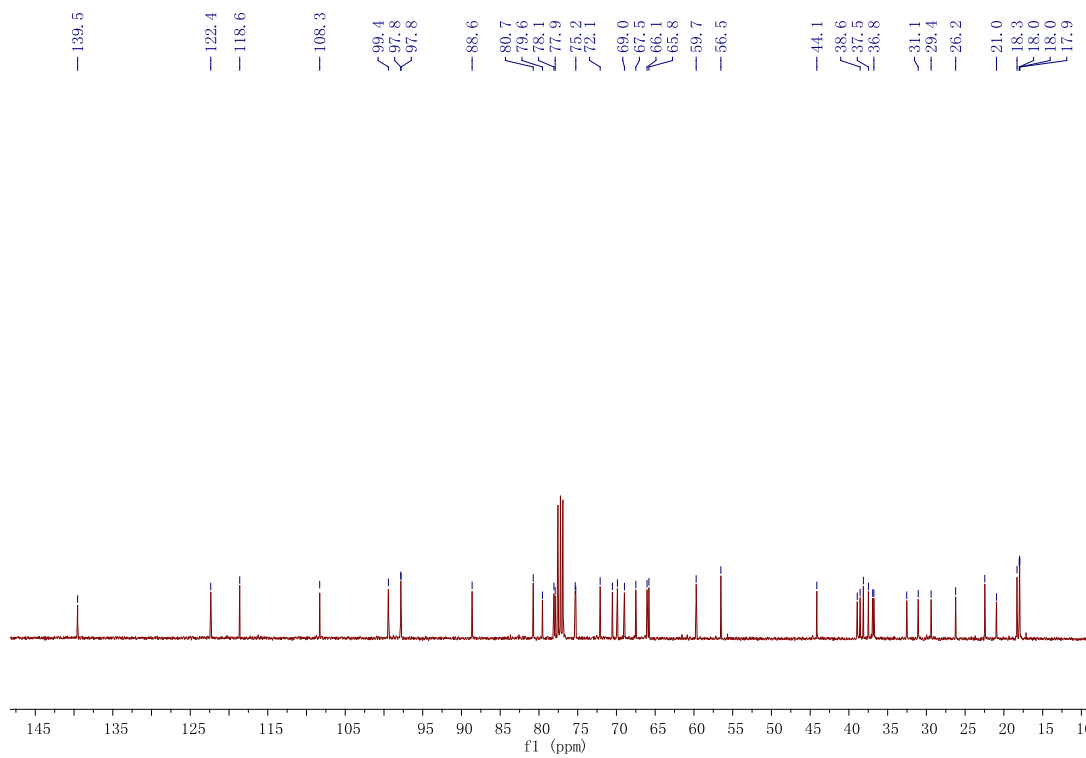

Figure S8  $^{13}\text{C}$  NMR spectrum of compound **2**

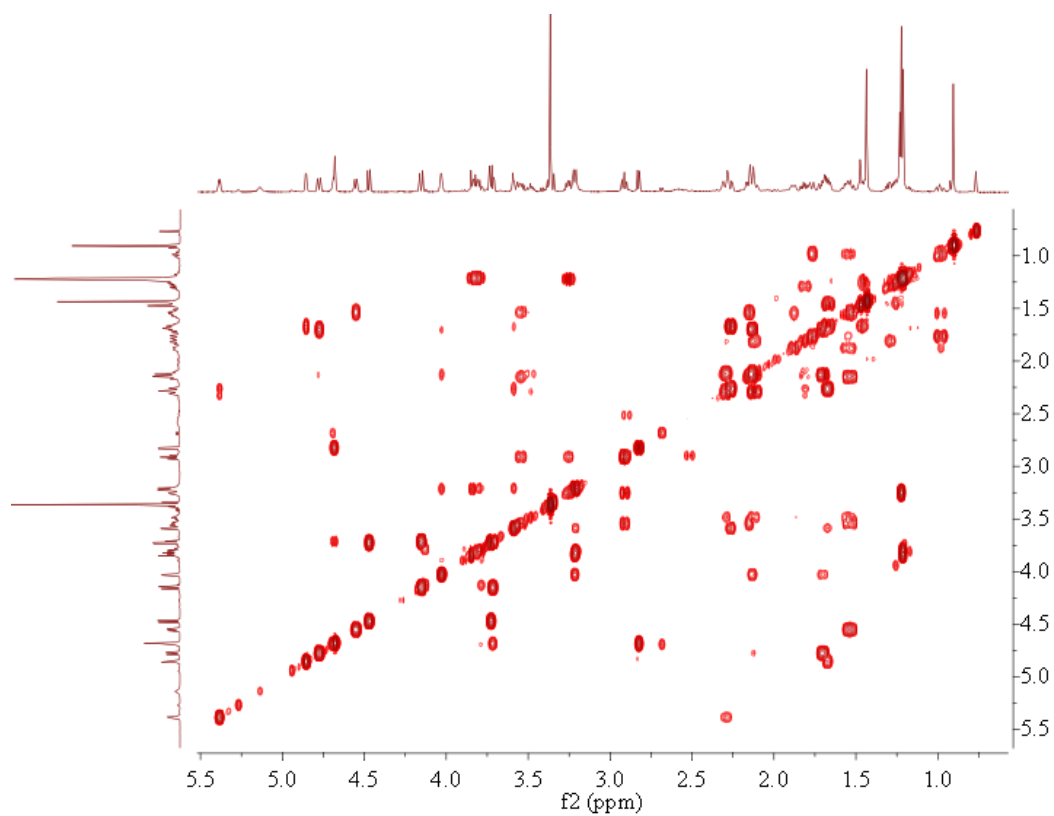

Figure S9  $^1\text{H}$ - $^1\text{H}$  COSY spectrum of compound **2**

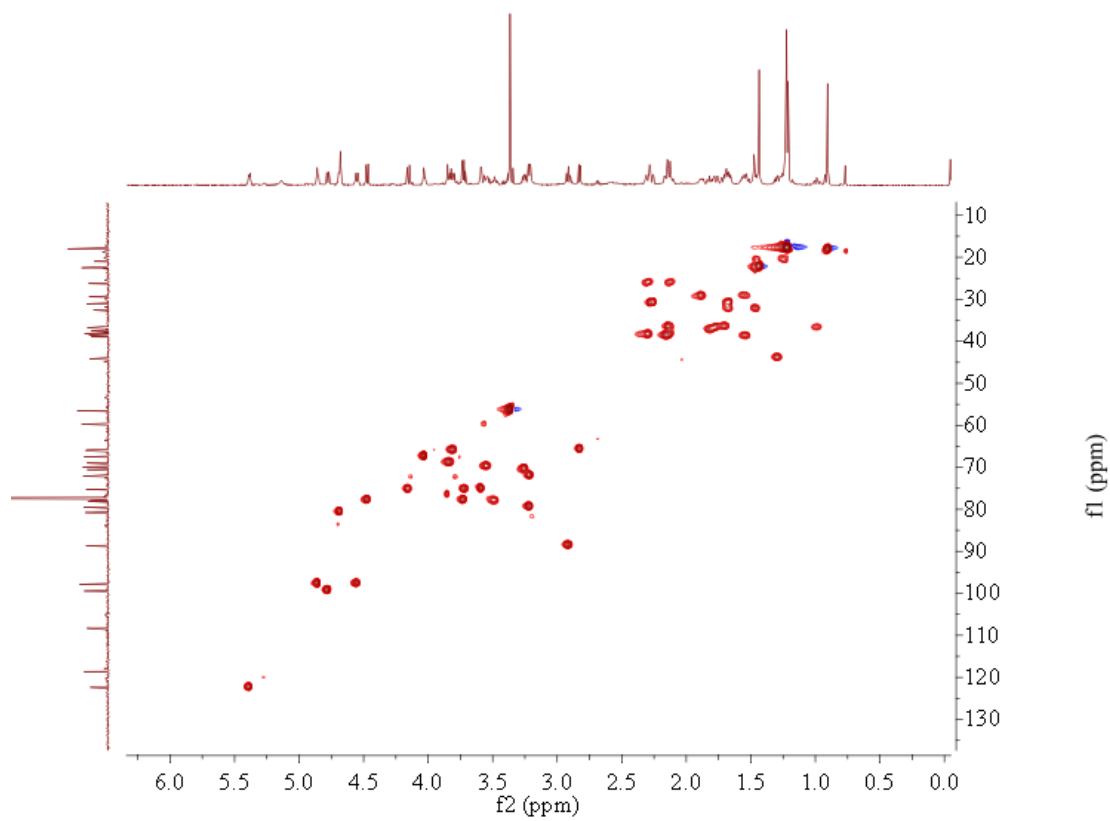

Figure S10 HSQC spectrum of compound **2**



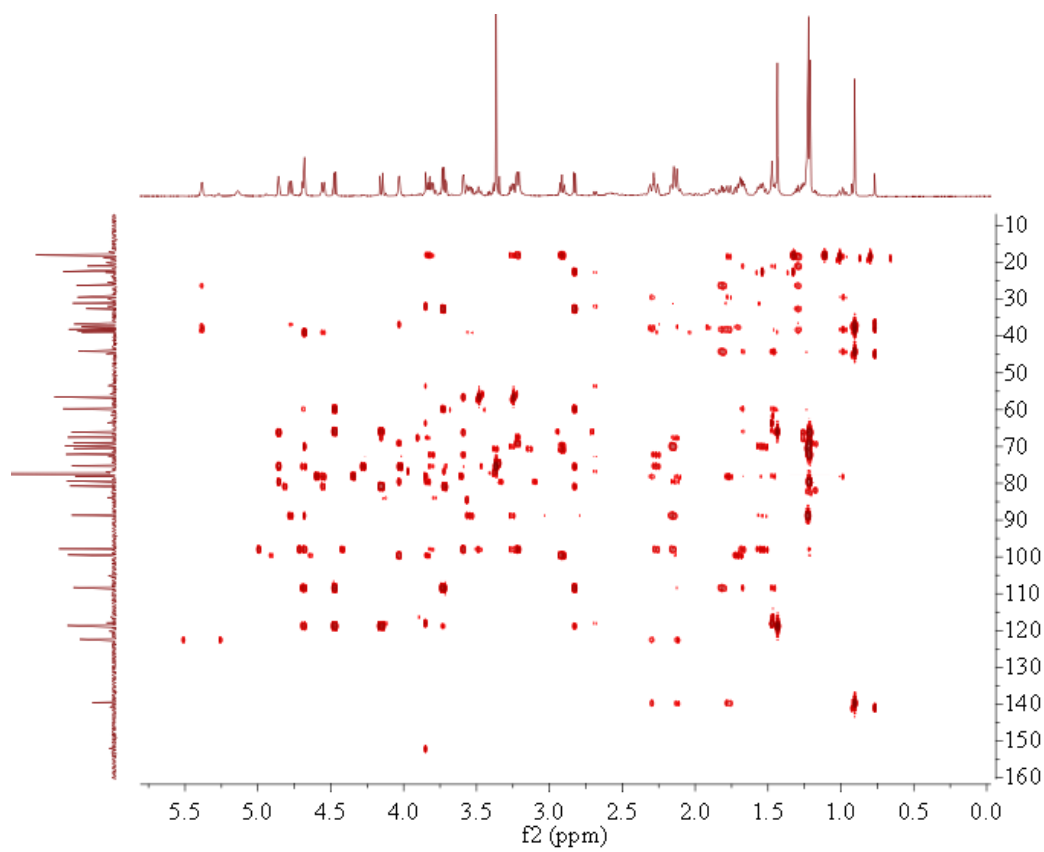

Figure S11 HMBC spectrum of compound **2**

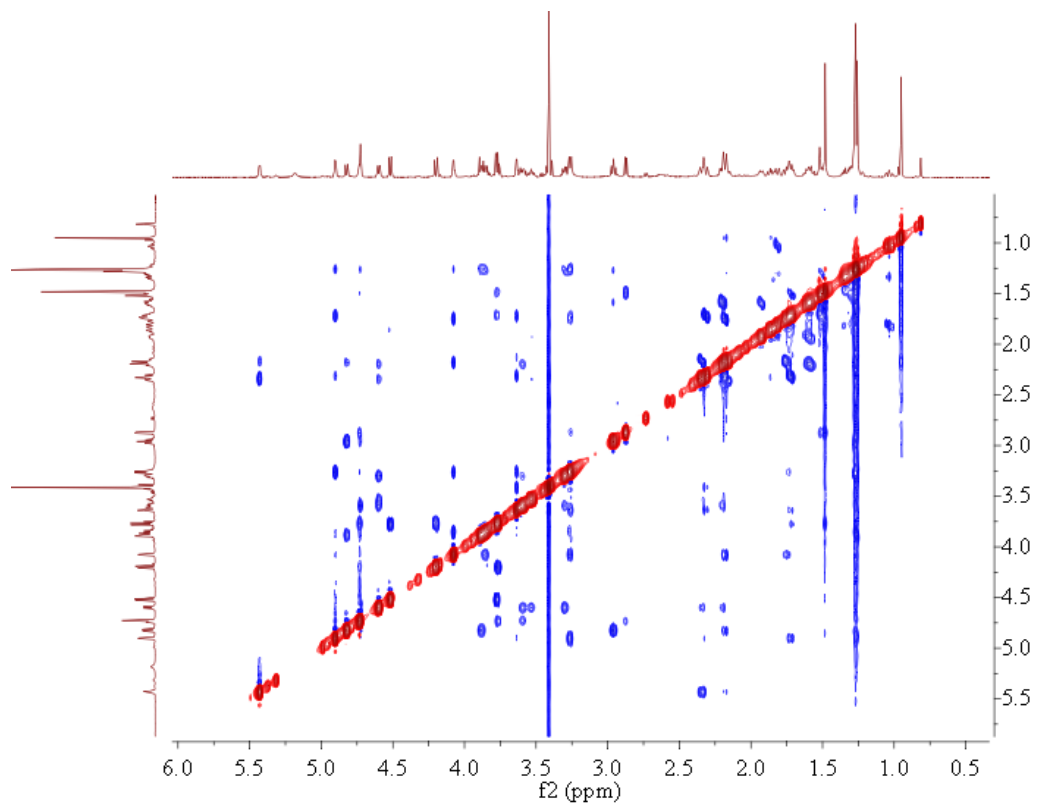

Figure S12 ROESY spectrum of compound **2**

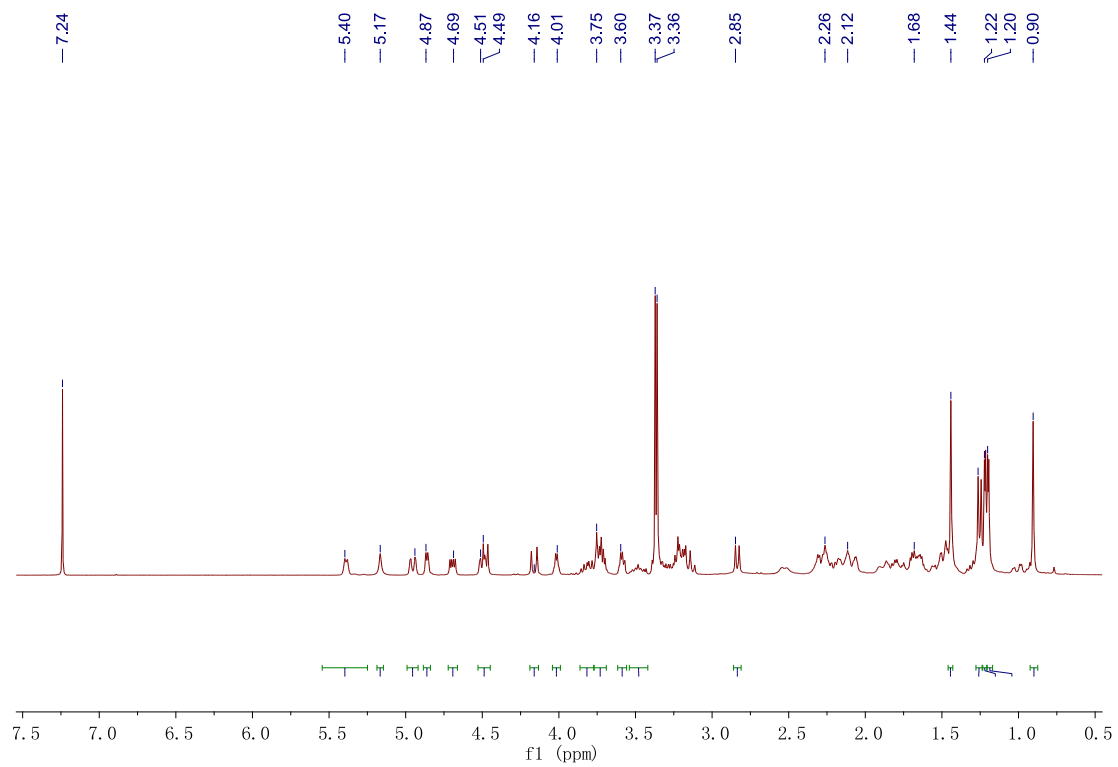

Figure S13  $^1\text{H}$  NMR spectrum of compound **3**

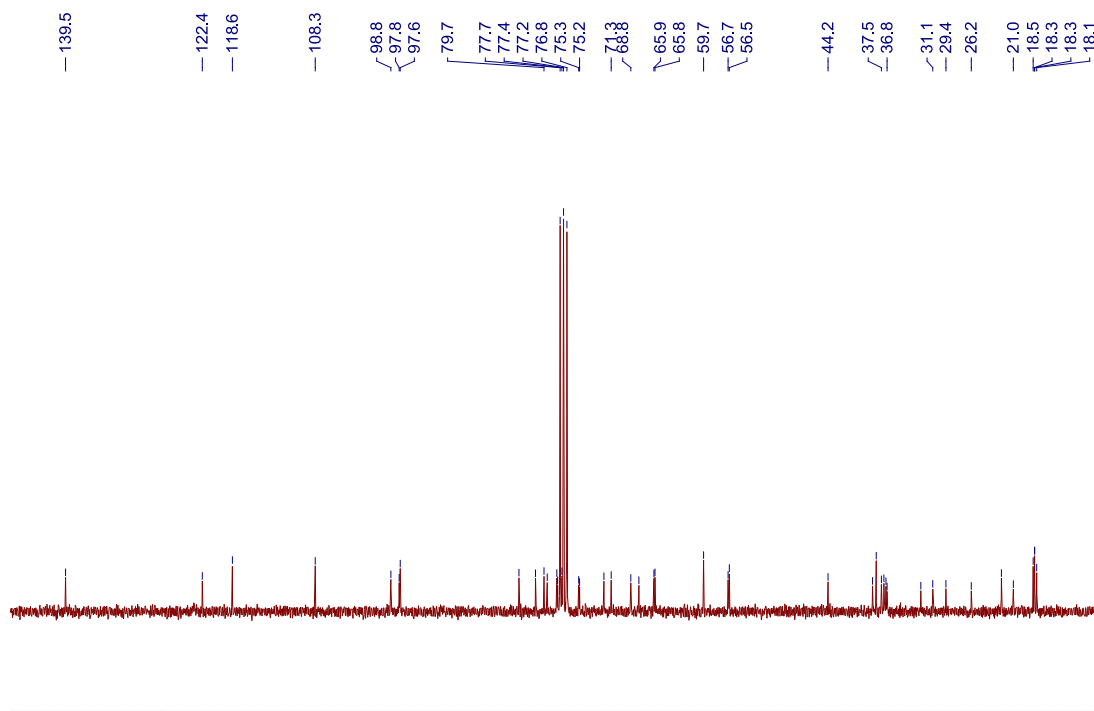

Figure S14  $^{13}\text{C}$  NMR spectrum of compound **3**

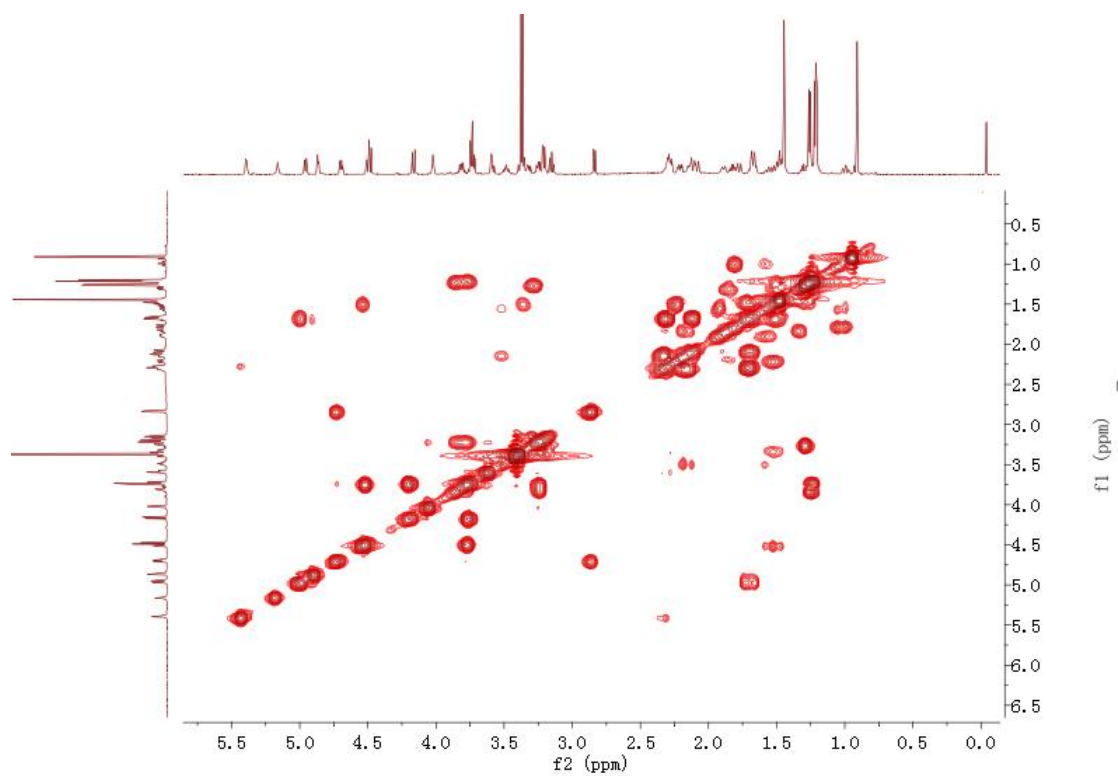

Figure S15  $^1\text{H}$ - $^1\text{H}$  COSY spectrum of compound **3**

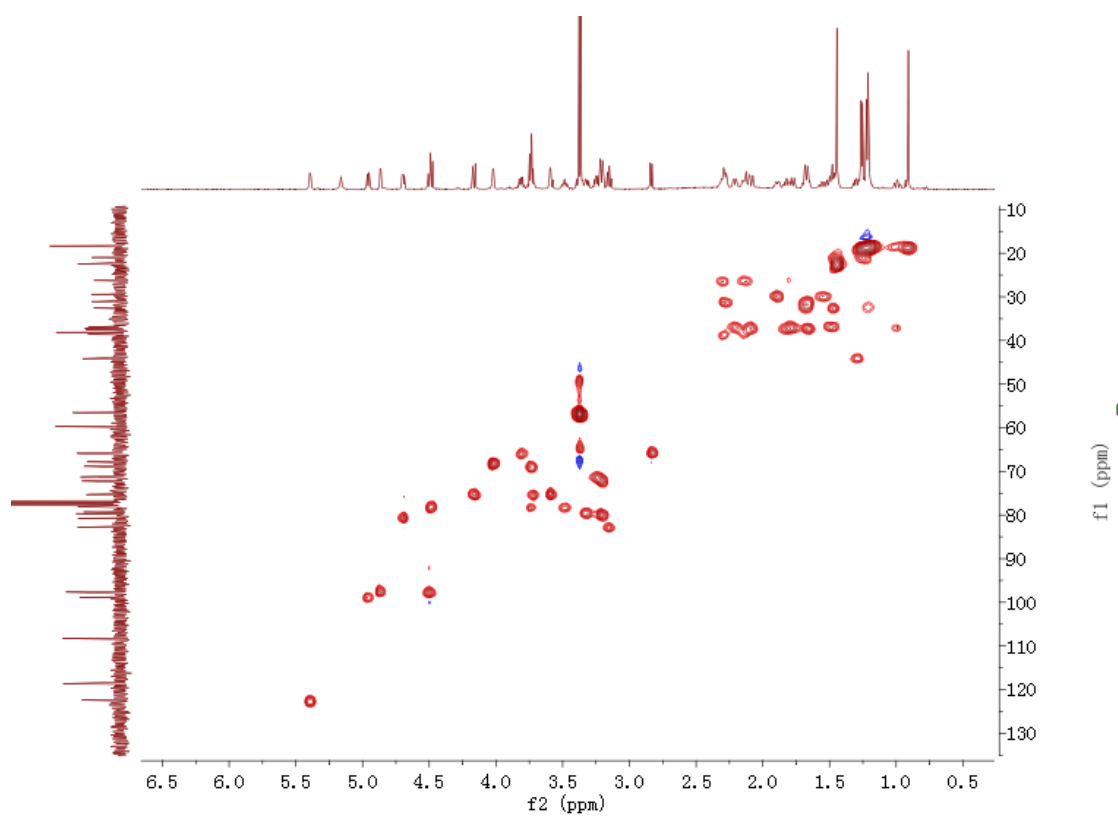

Figure S16 HSQC spectrum of compound **3**

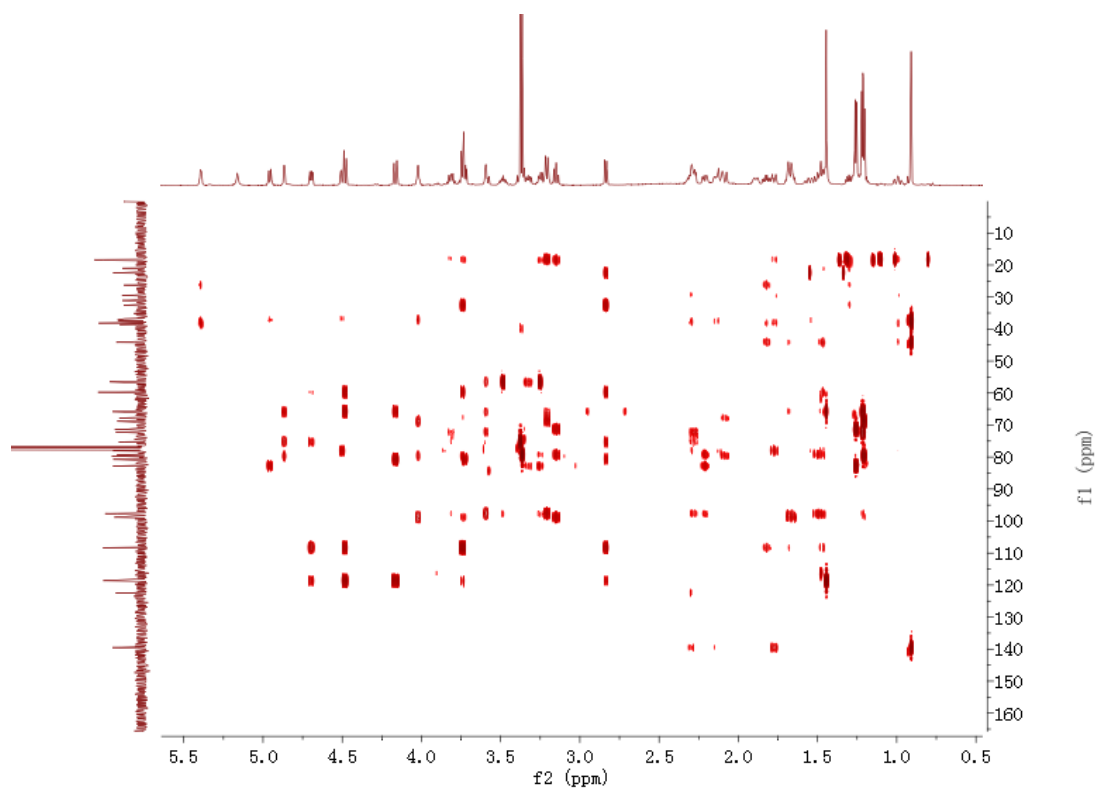

Figure S17 HMBC spectrum of compound **3**

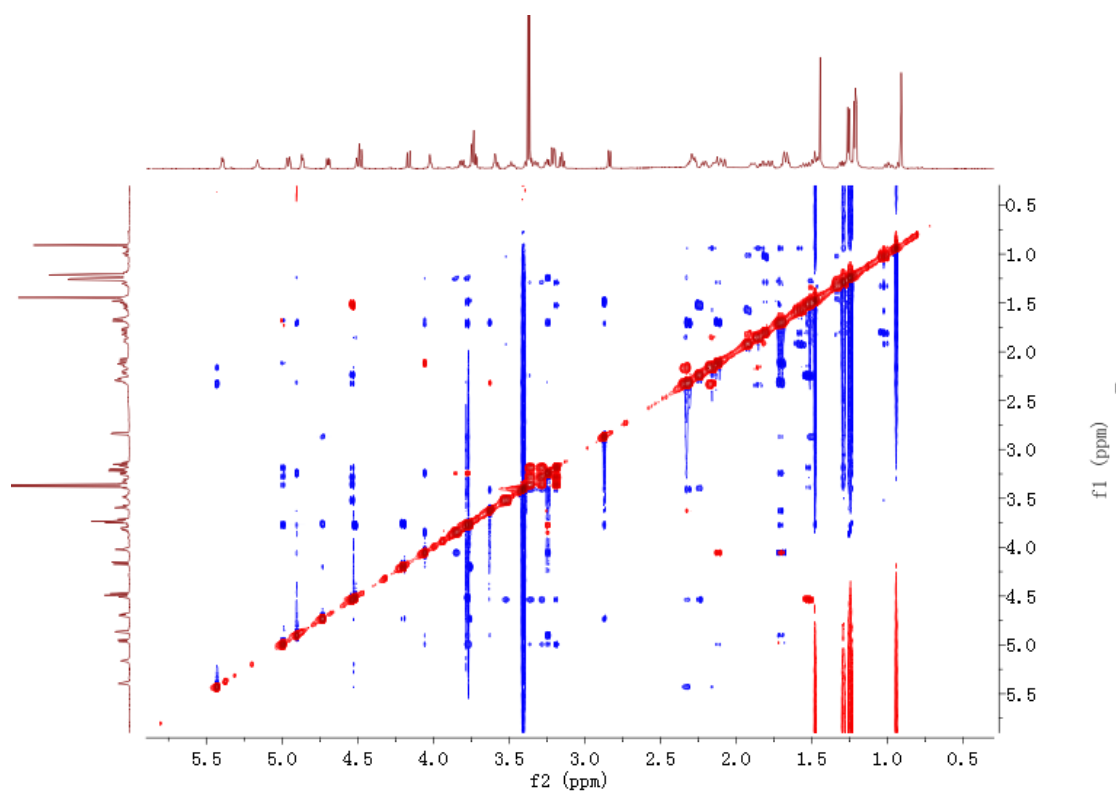

Figure S18 ROESY spectrum of compound **3**

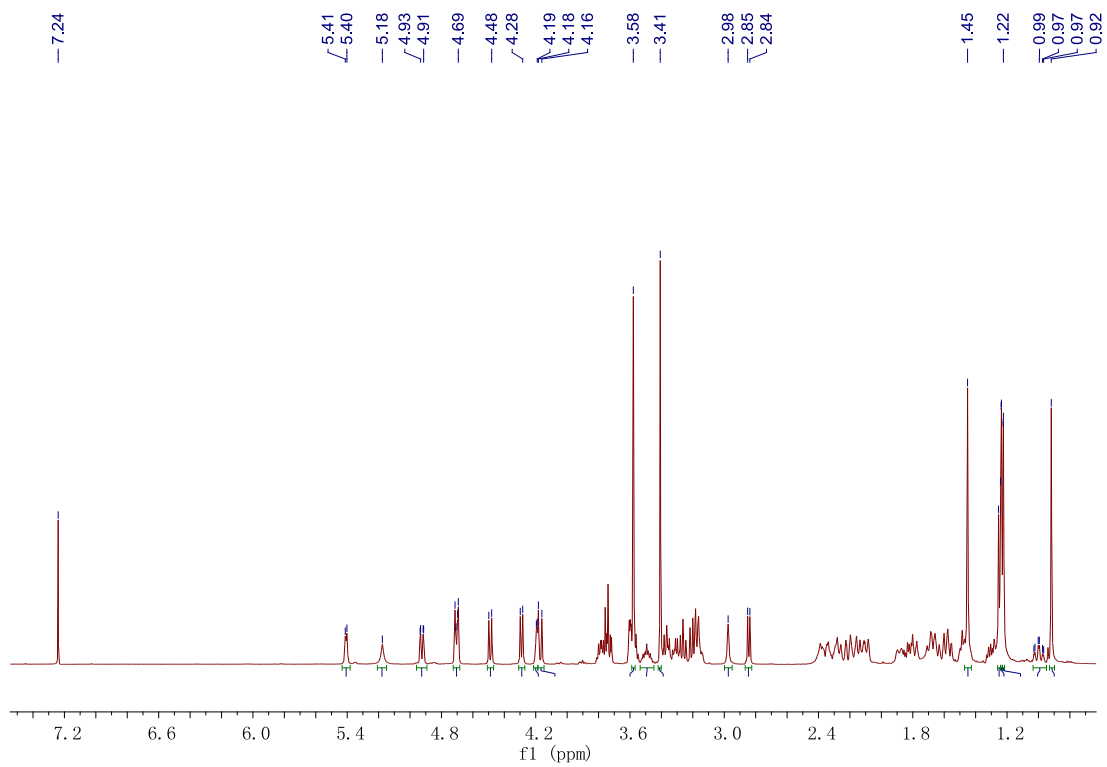

Figure S19  $^1\text{H}$  NMR spectrum of compound **4**

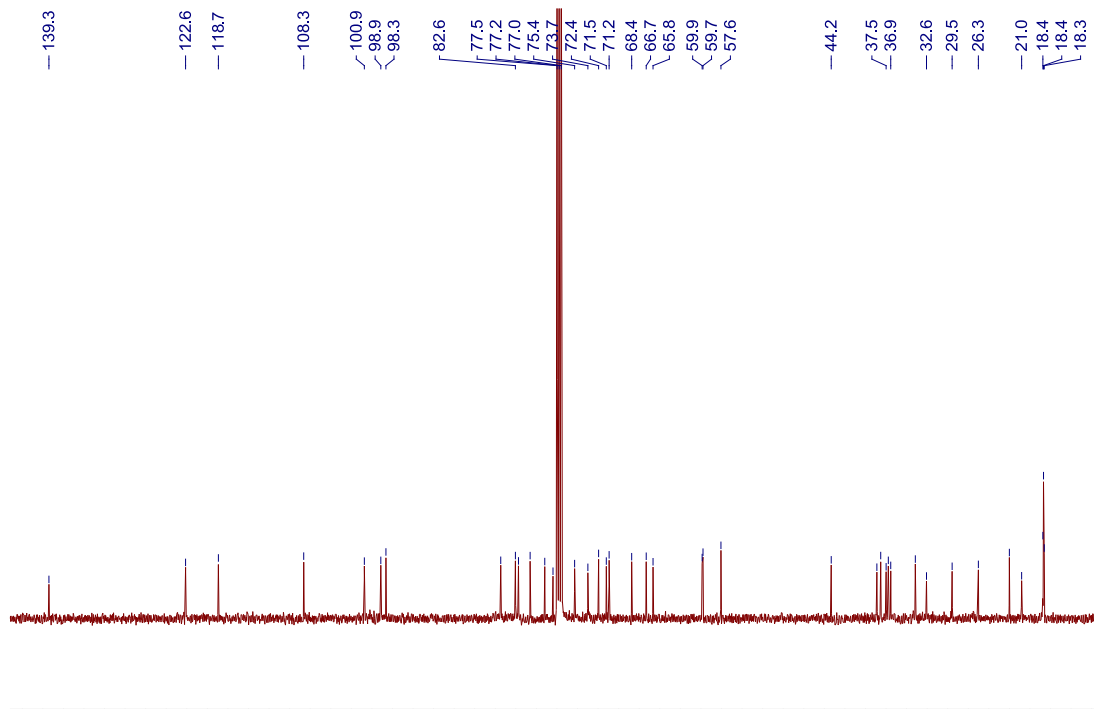

Figure S20  $^{13}\text{C}$  NMR spectrum of compound **4**

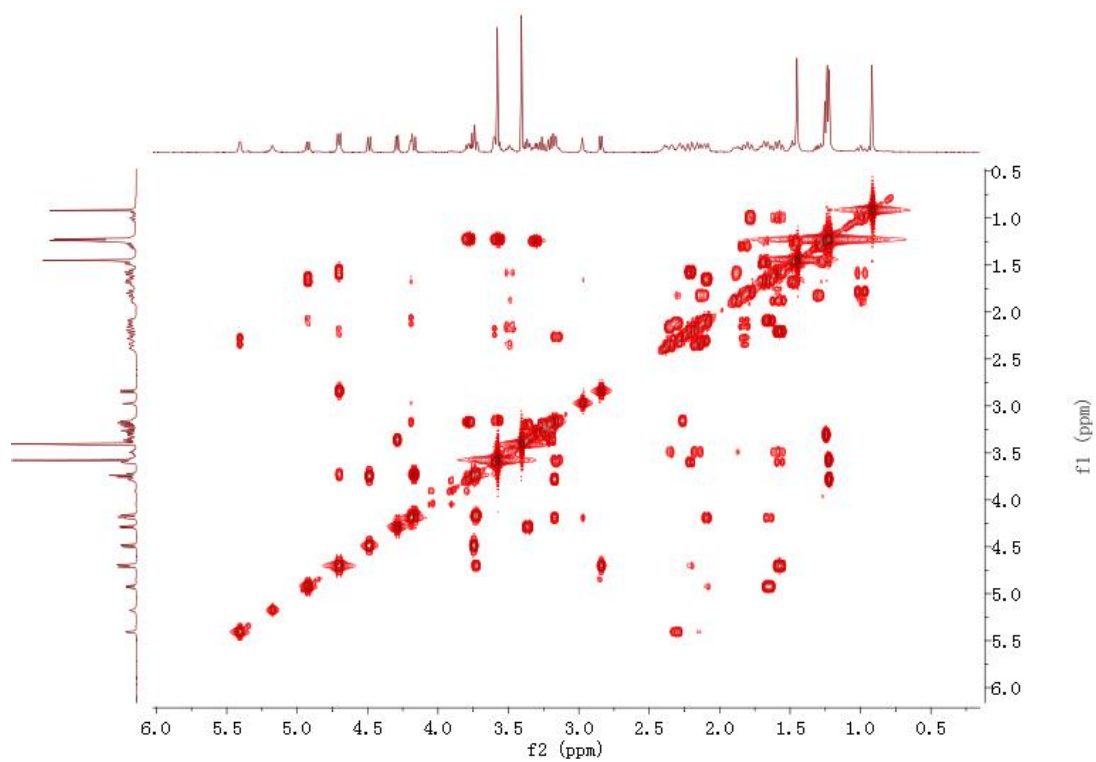

Figure S21  $^1\text{H}$ - $^1\text{H}$  COSY spectrum of compound **4**

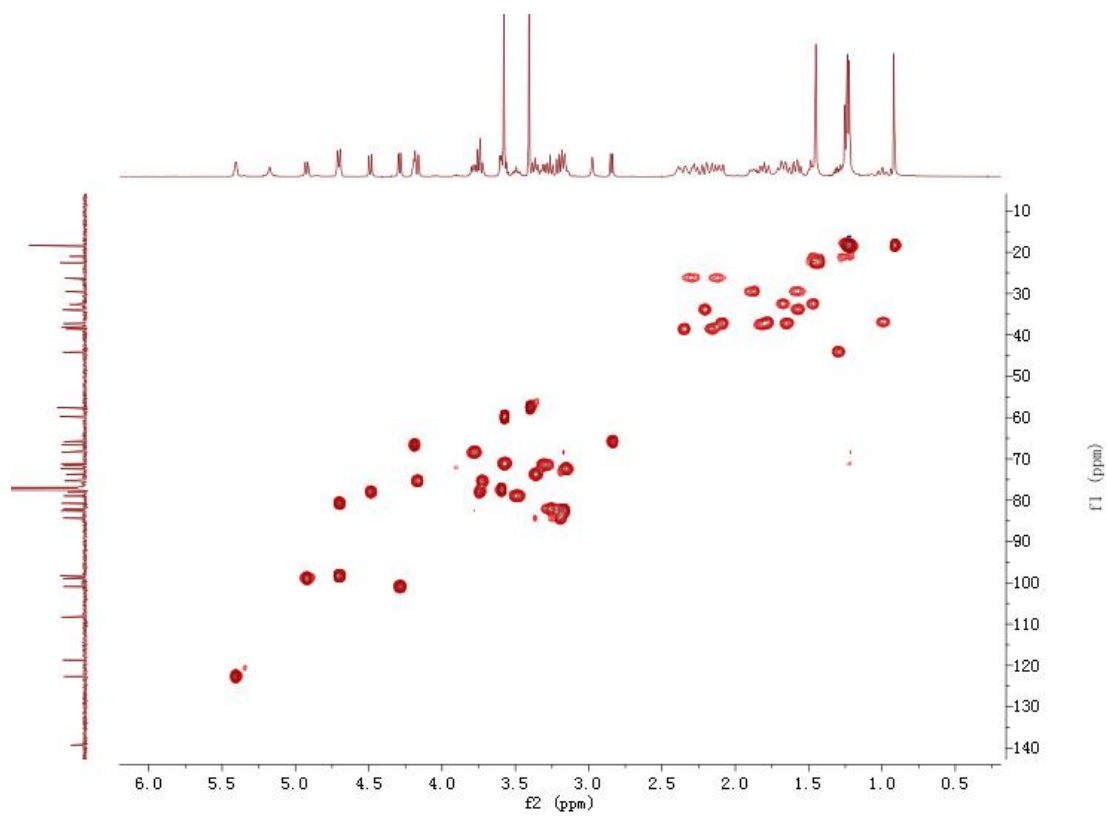

Figure S22 HSQC spectrum of compound **4**

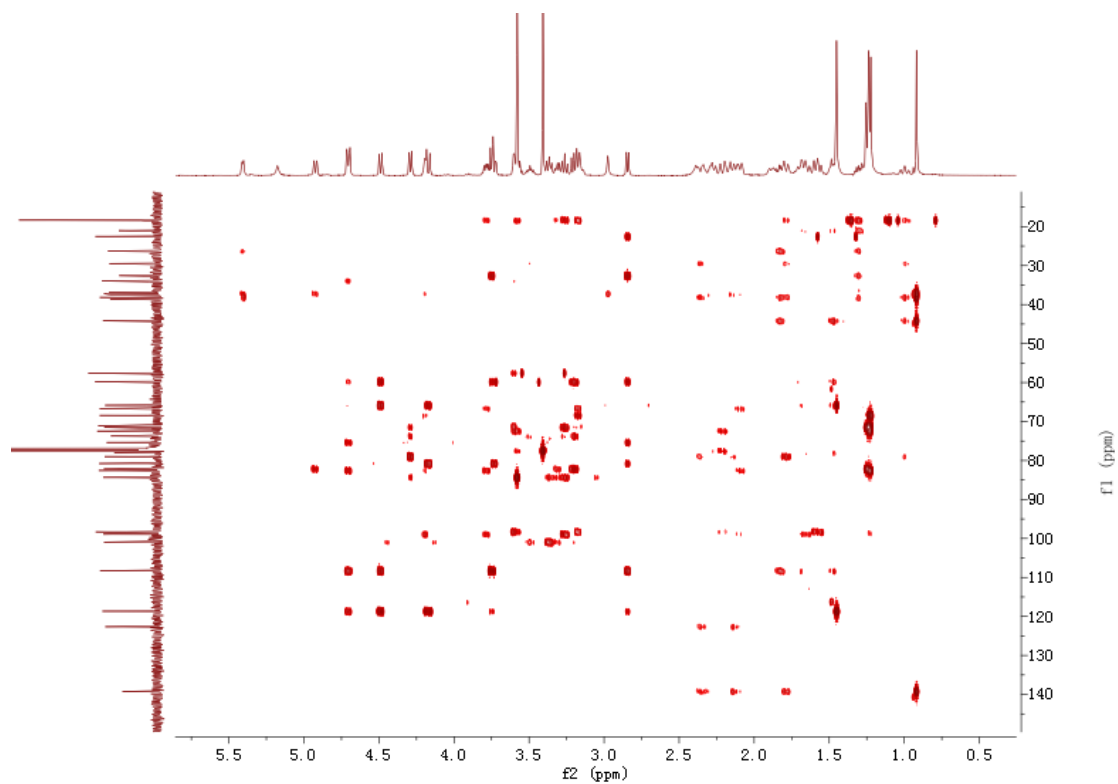

Figure S23 HMBC spectrum of compound **4**

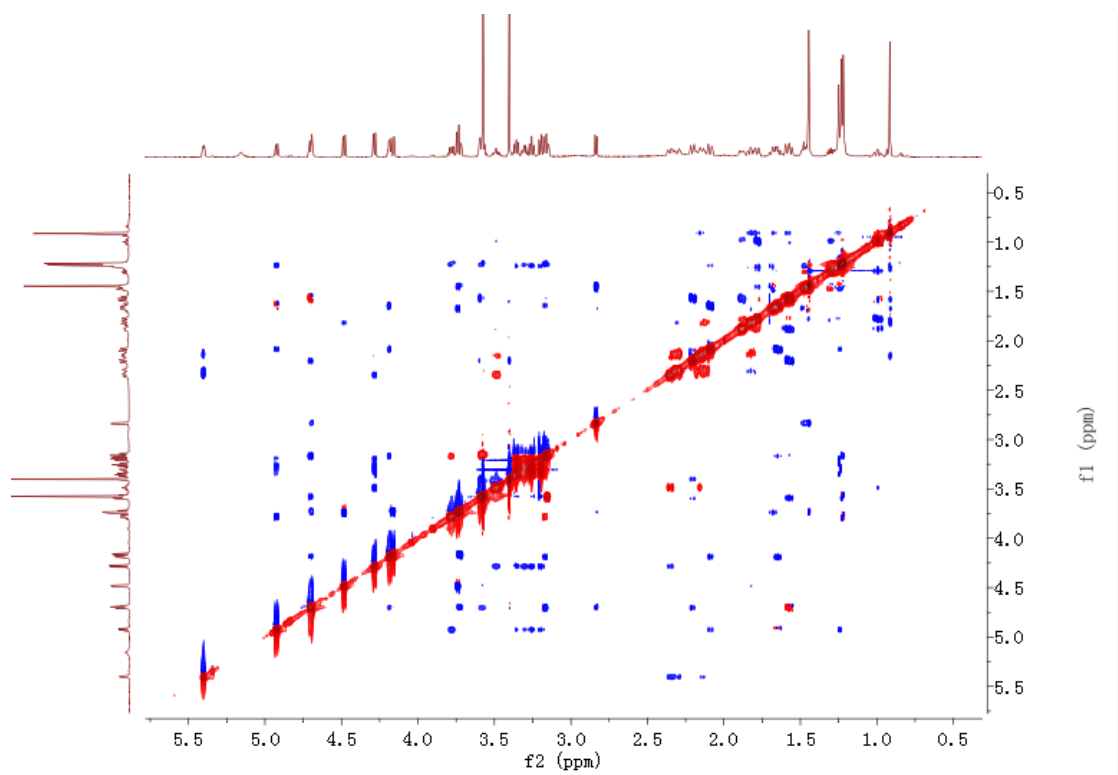

Figure S24 ROESY spectrum of compound **4**

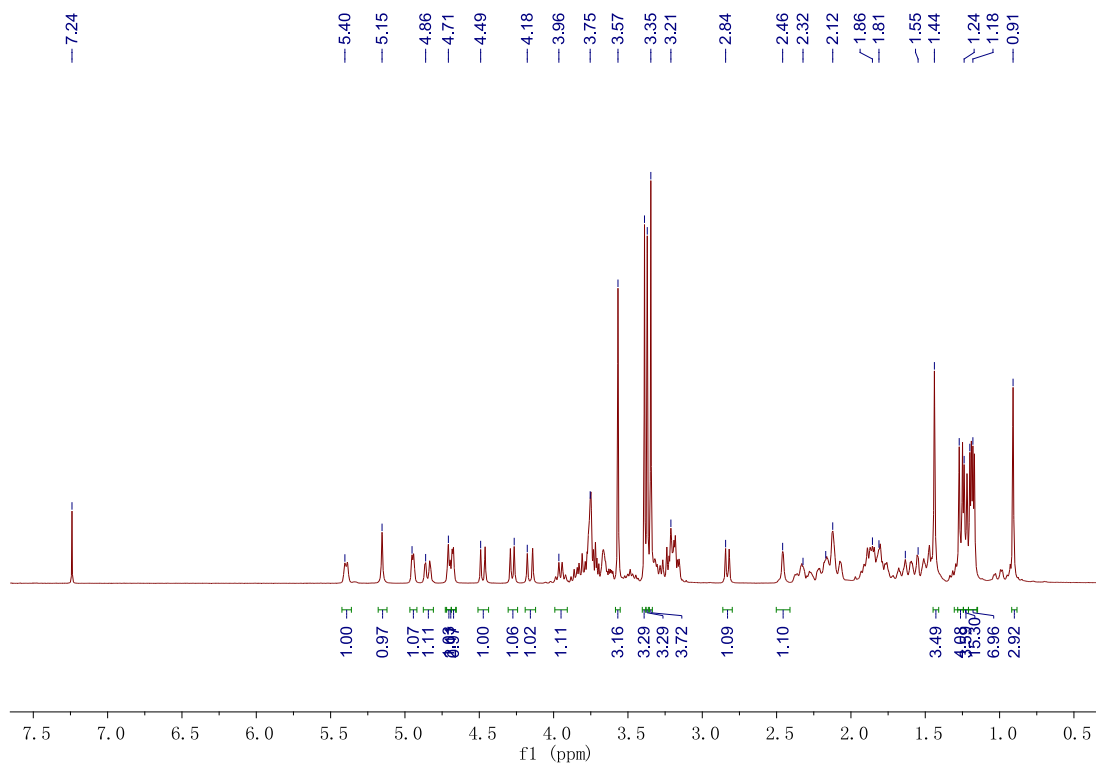

Figure S25  $^1\text{H}$  NMR spectrum of compound **5**

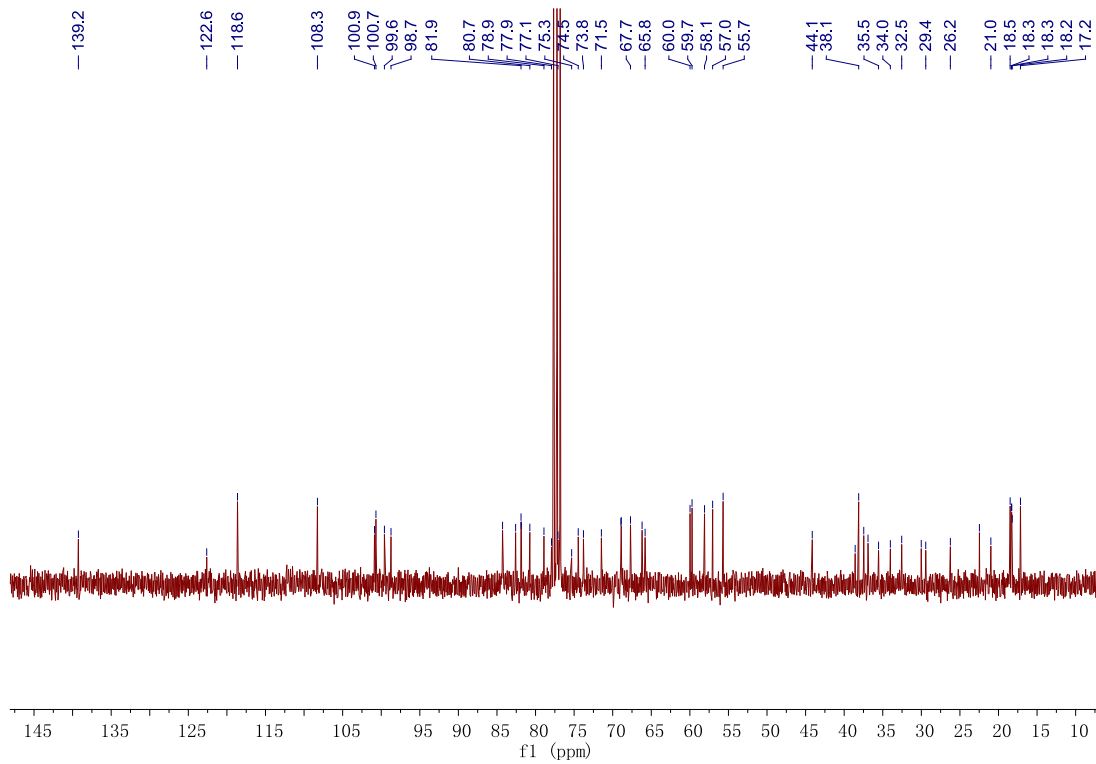

Figure S26  $^{13}\text{C}$  NMR spectrum of compound **5**



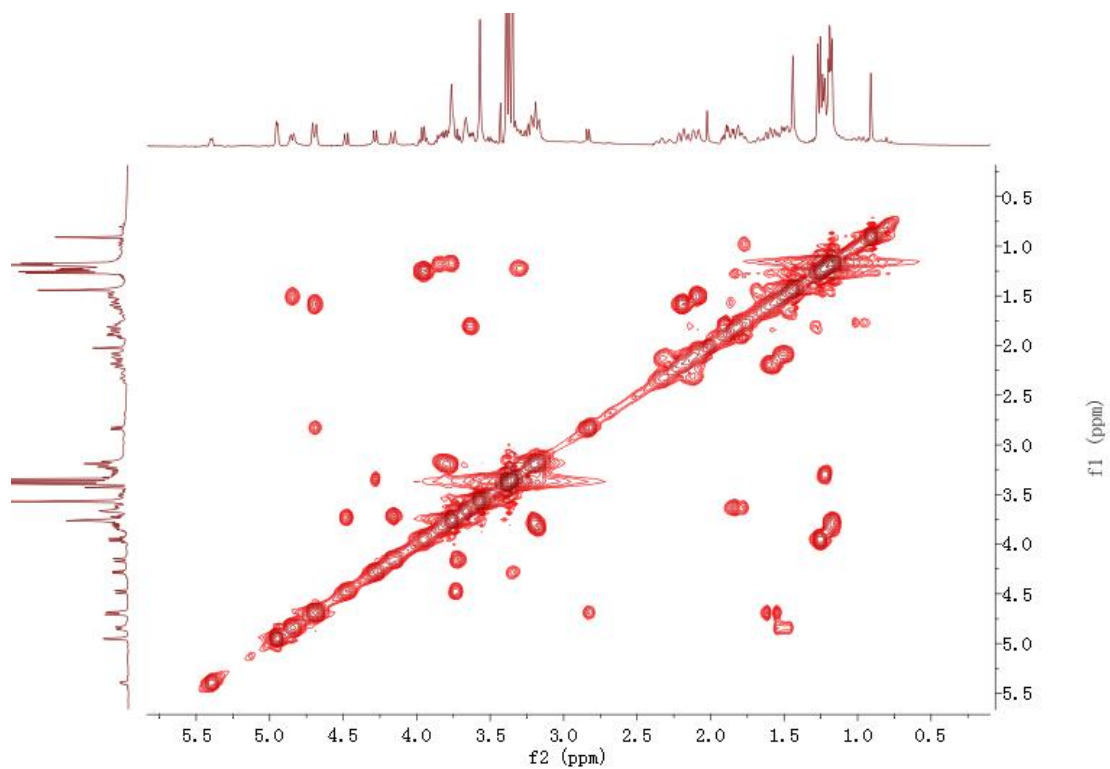

Figure S27  $^1\text{H}$ - $^1\text{H}$  COSY spectrum of compound **5**

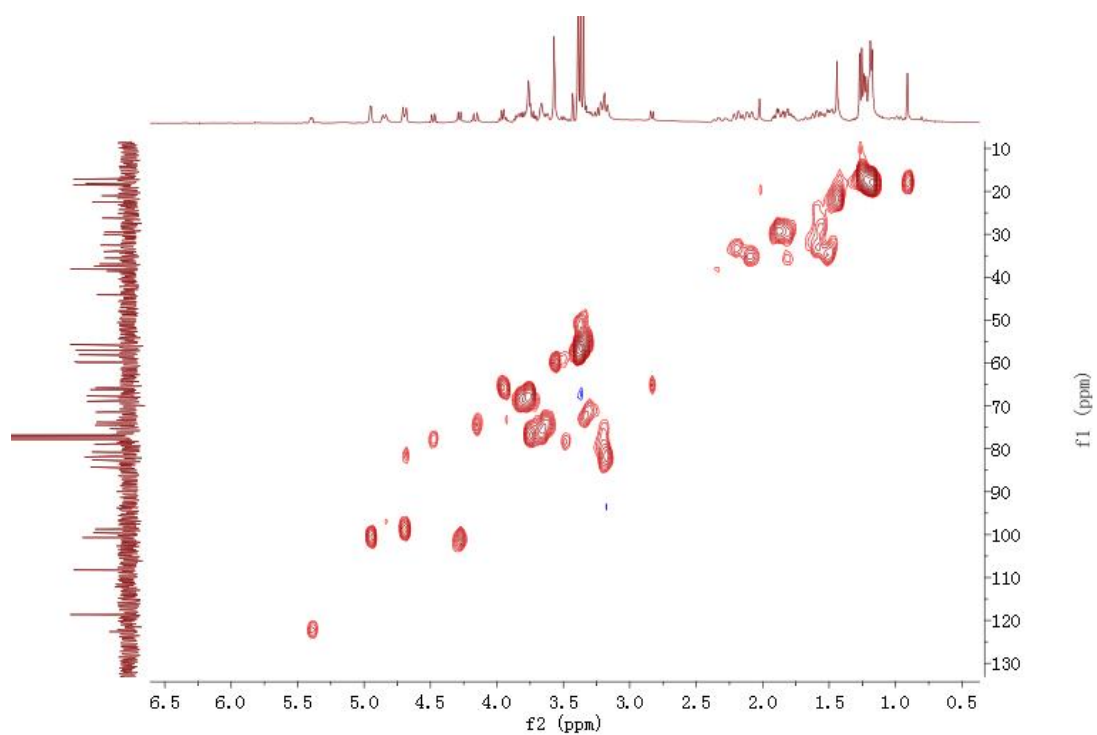

Figure S28 HSQC spectrum of compound **5**

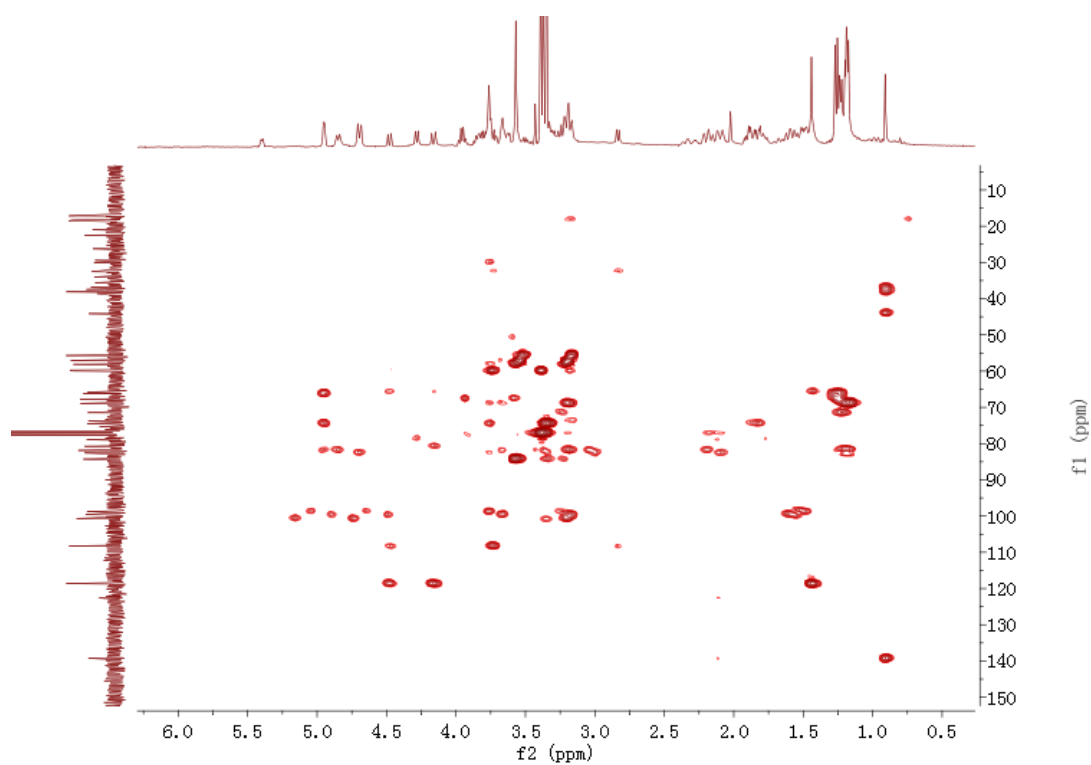

Figure S29 HMBC spectrum of compound **5**

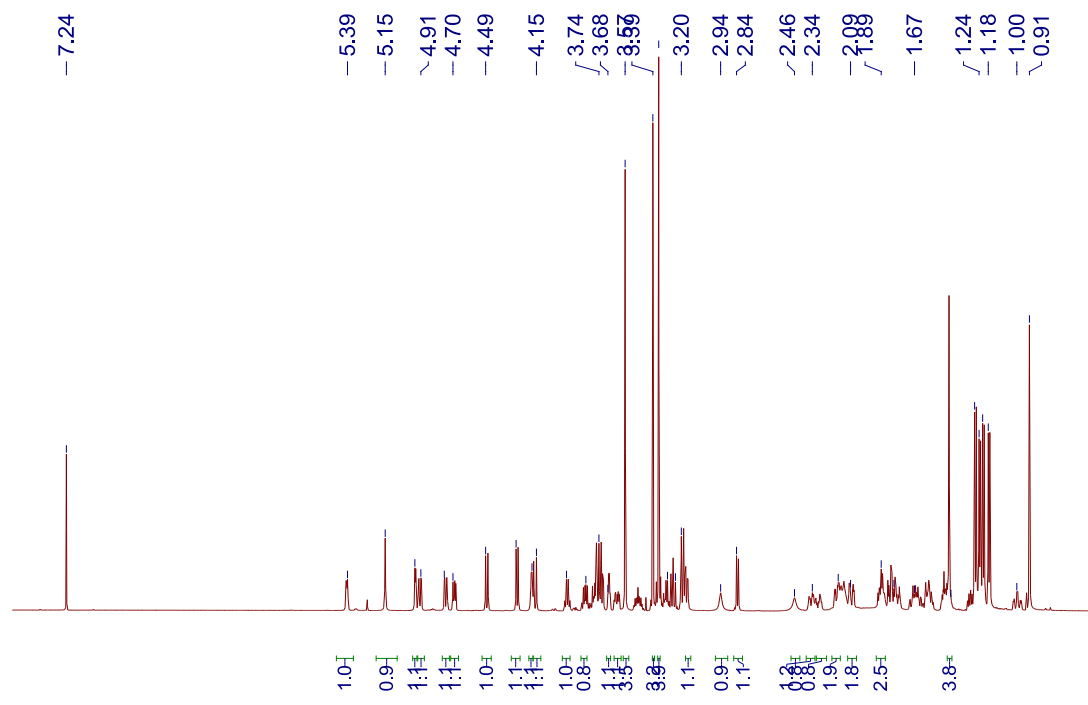

Figure S30  $^1\text{H}$  NMR spectrum of compound **6**

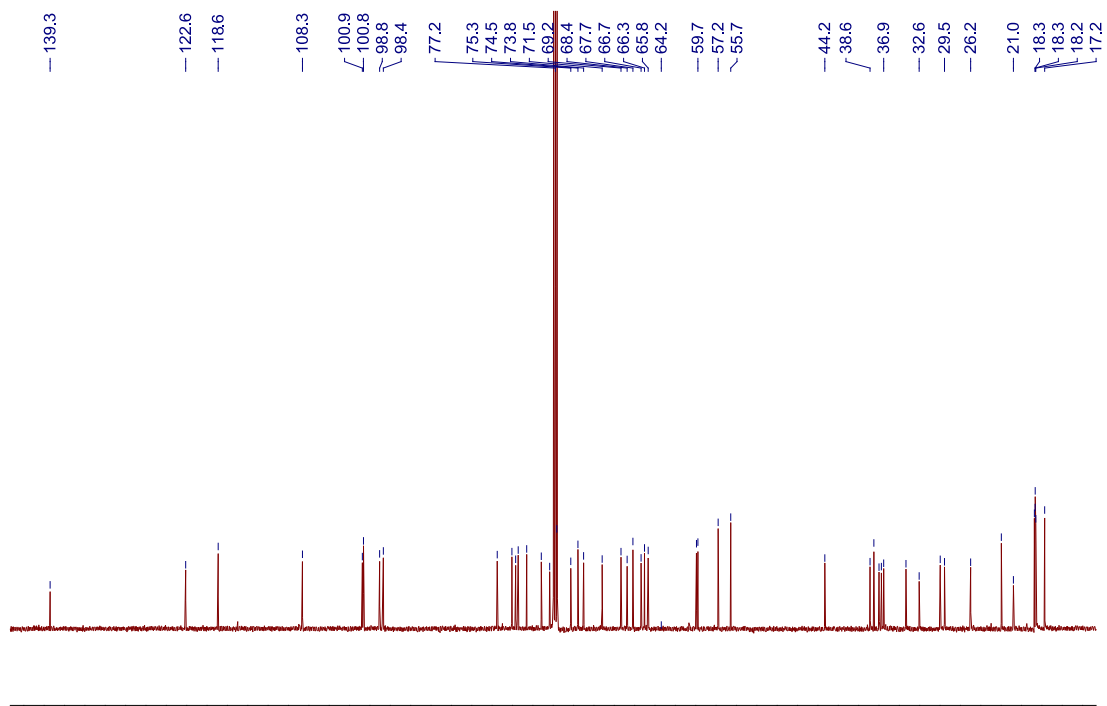

Figure S31  $^{13}\text{C}$  NMR spectrum of compound **6**

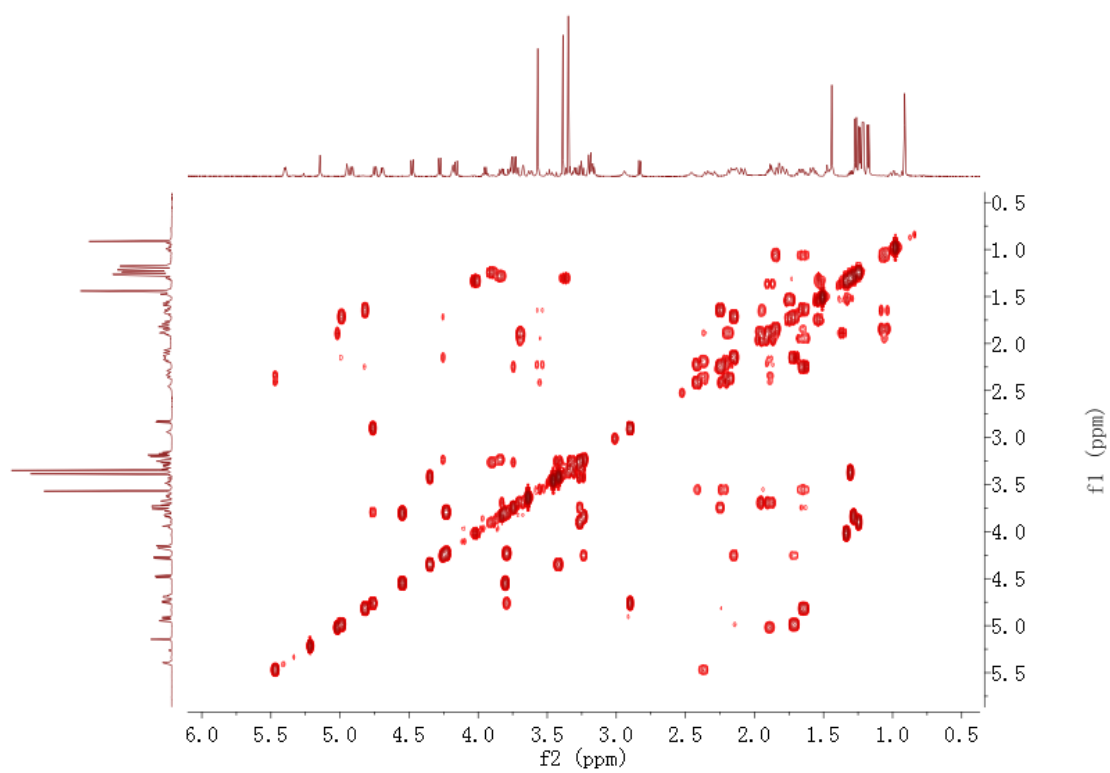

Figure S32  $^1\text{H}$ - $^1\text{H}$  COSY spectrum of compound **6**

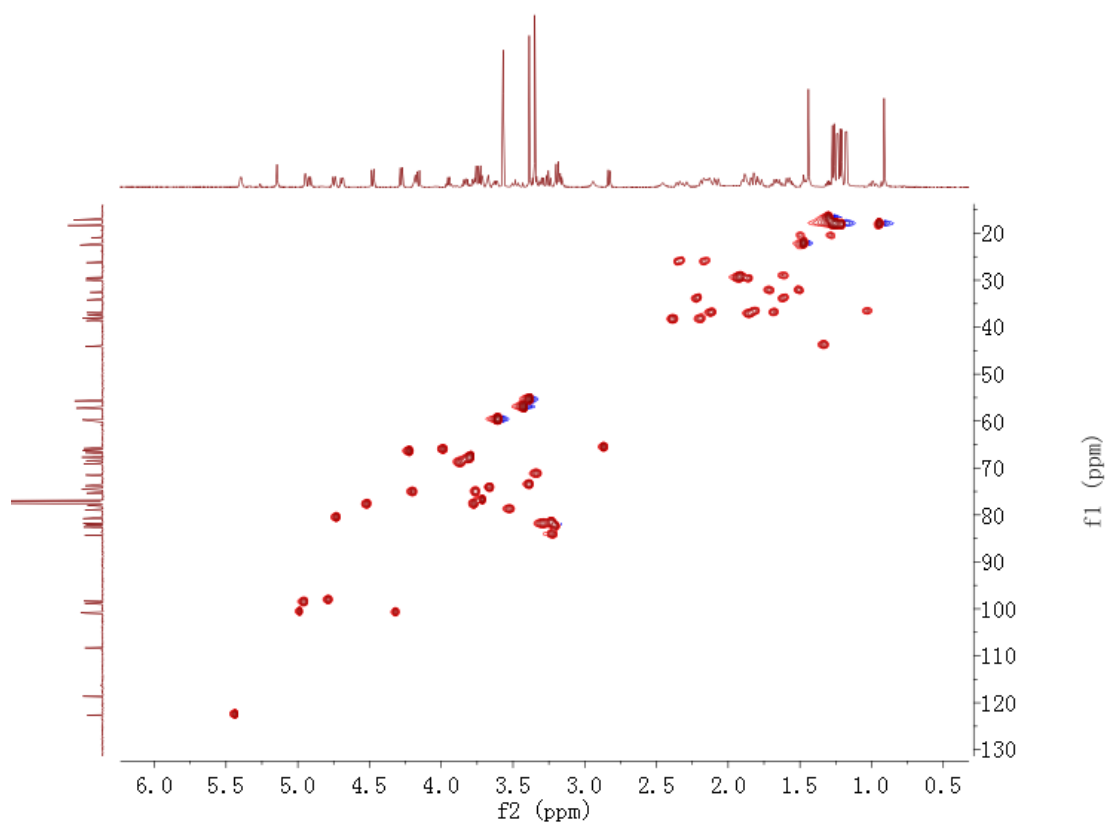

Figure S33 HSQC spectrum of compound **6**

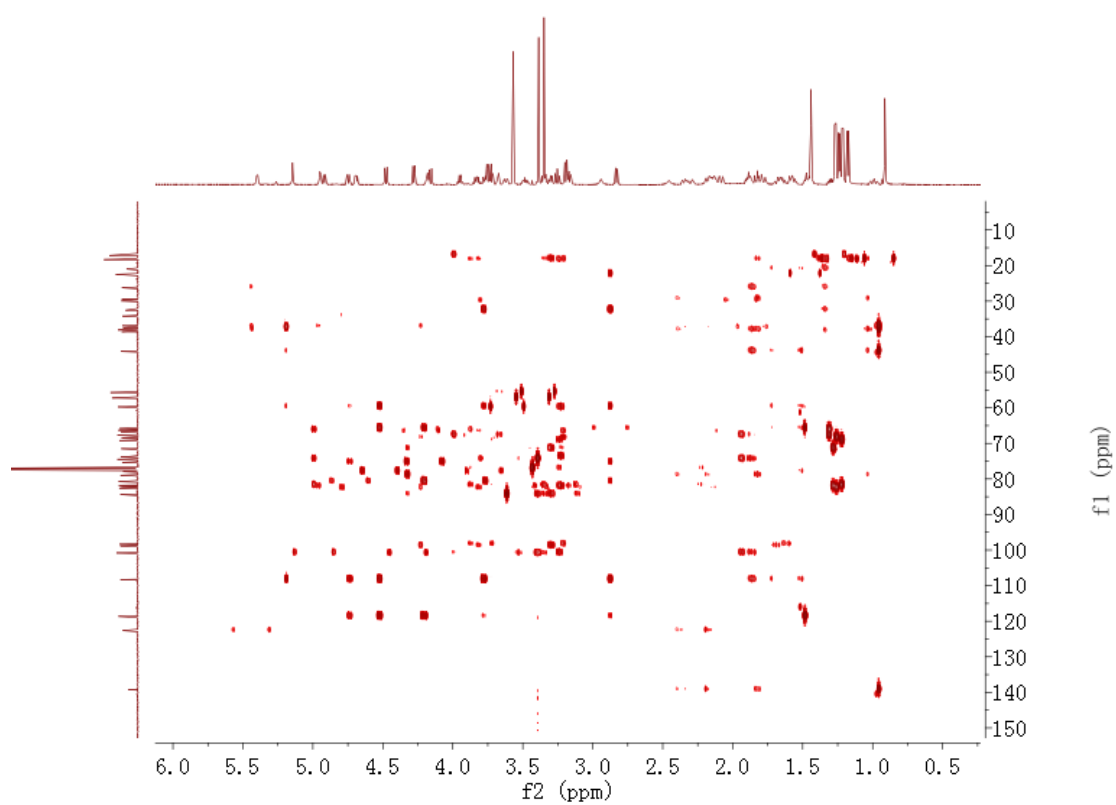

Figure S34 HMBC spectrum of compound **6**

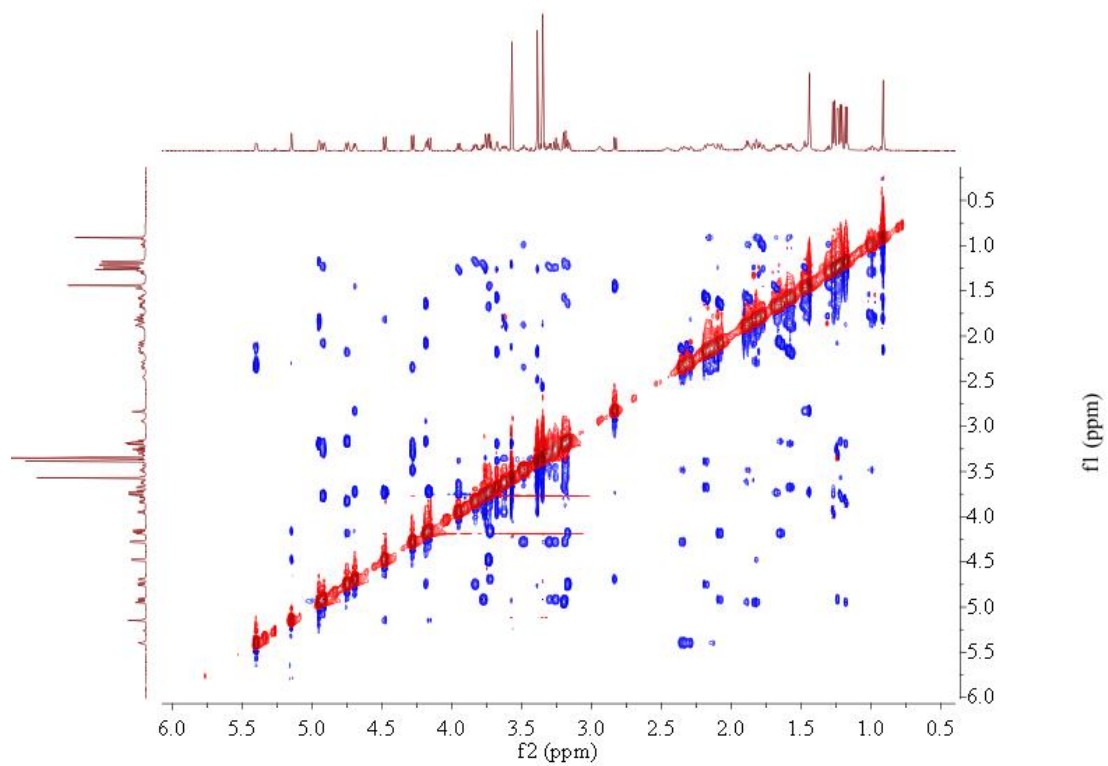

Figure S35 ROESY spectrum of compound **6**

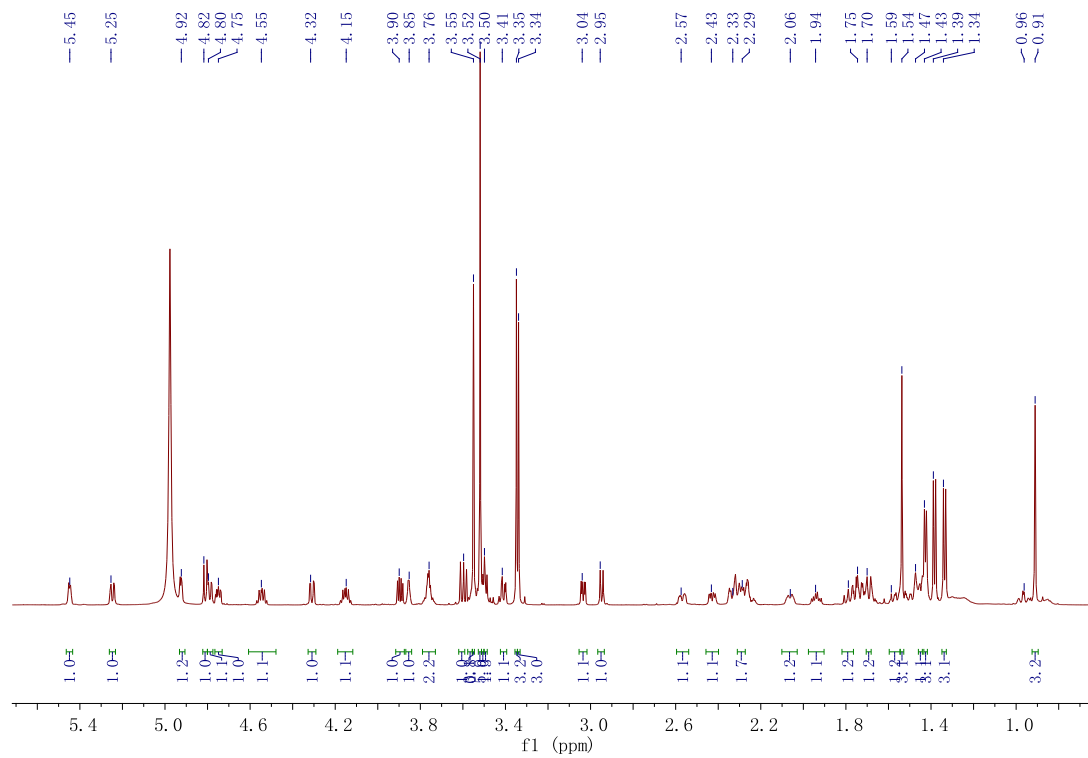

Figure S36  $^1\text{H}$  NMR spectrum of compound **2a**

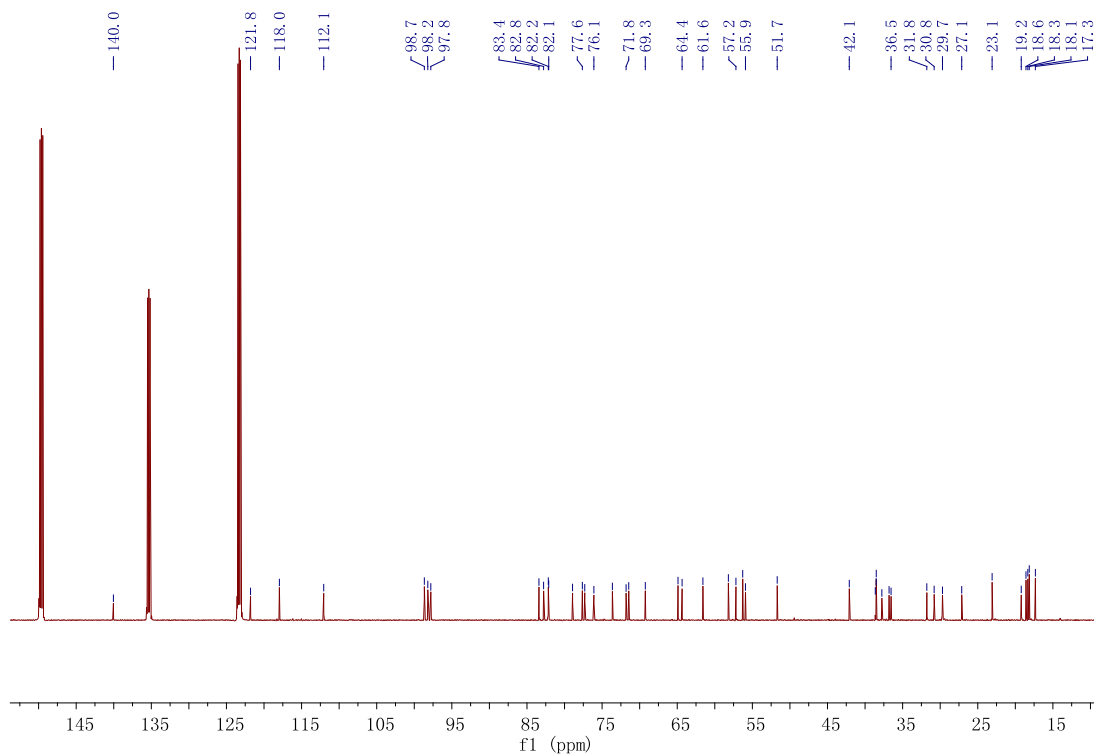

Figure S37  $^{13}\text{C}$  NMR spectrum of compound **2a**

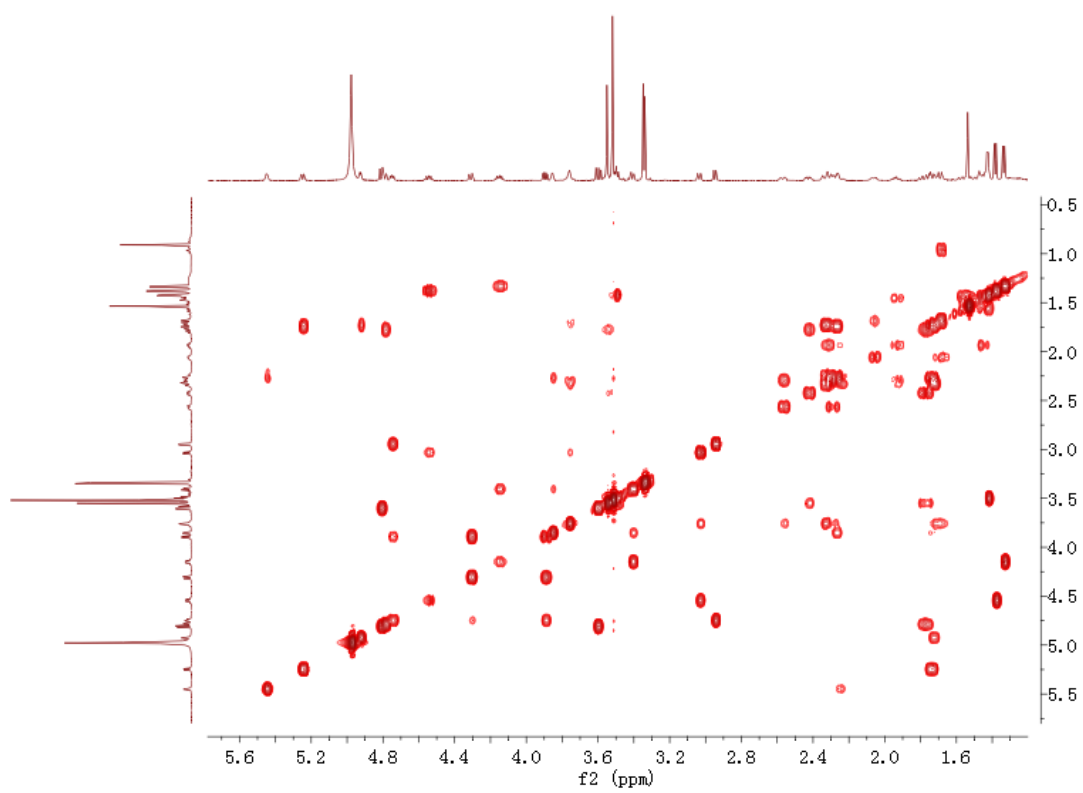

Figure S38  $^1\text{H}$ - $^1\text{H}$  COSY spectrum of compound **2a**

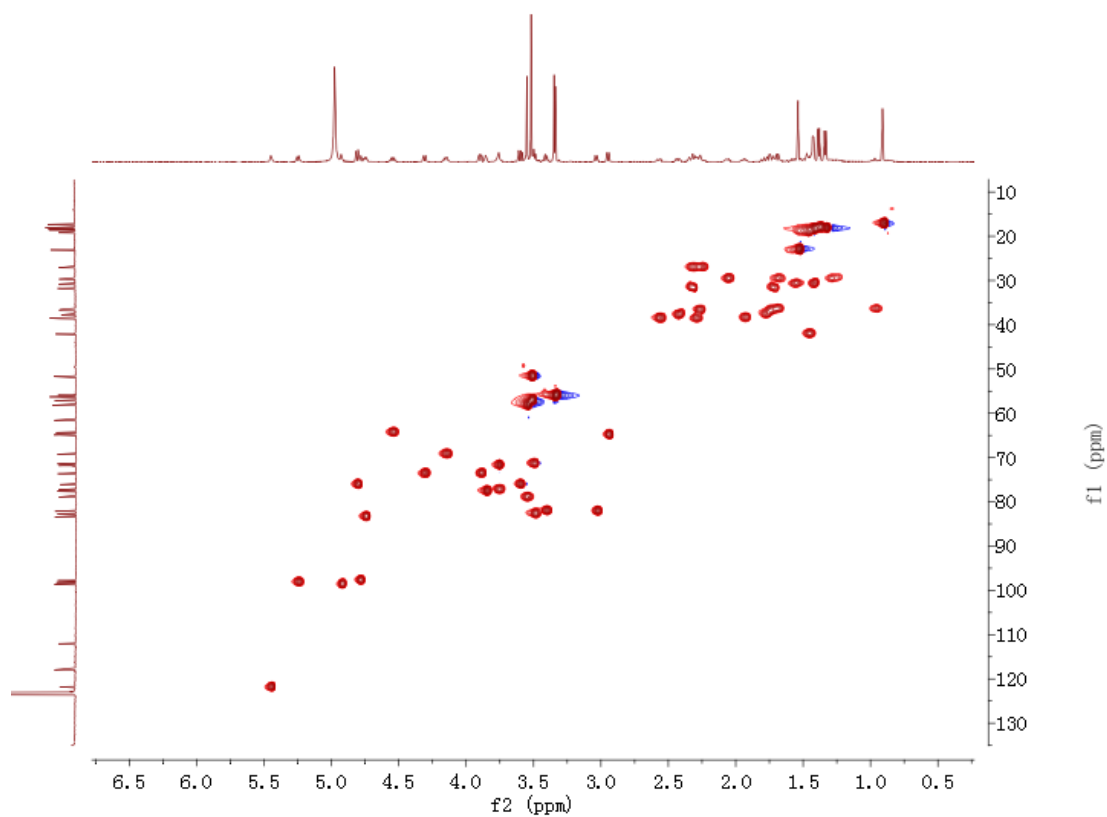

Figure S39 HSQC spectrum of compound **2a**

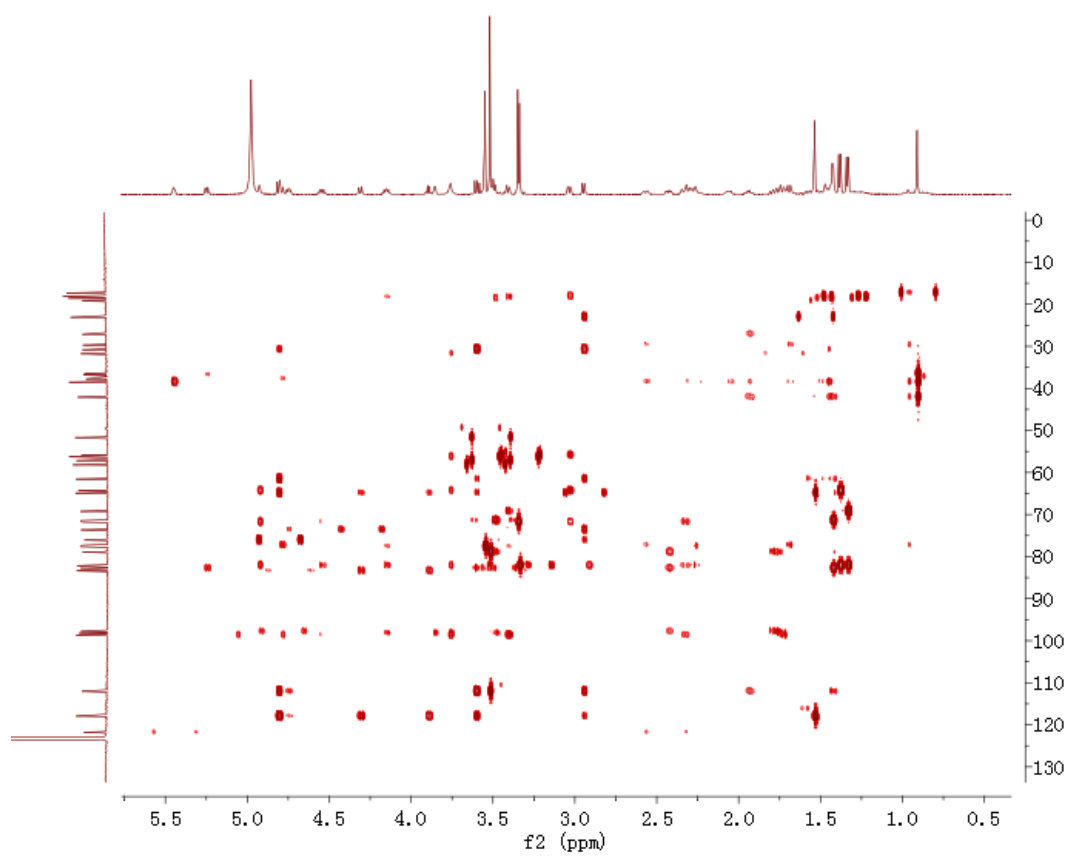

Figure S40 HMBC spectrum of compound **2a**

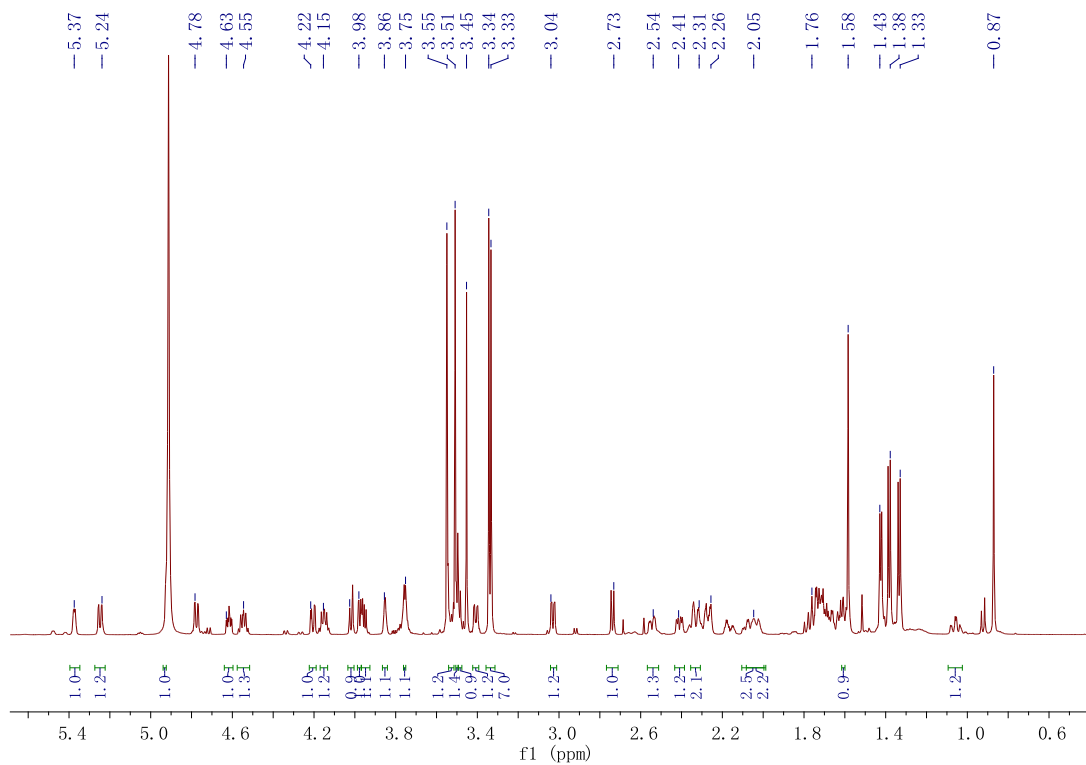

Figure S41  $^1\text{H}$  NMR spectrum of compound **2b**

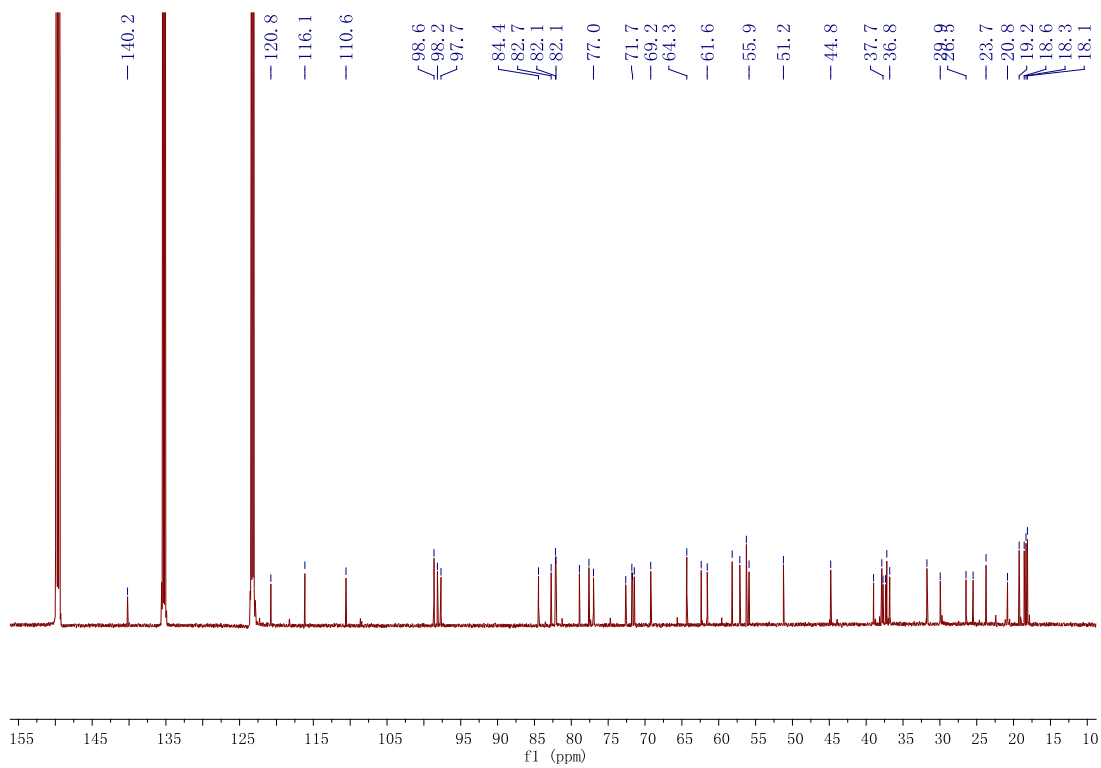

Figure S42  $^{13}\text{C}$  NMR spectrum of compound **2b**



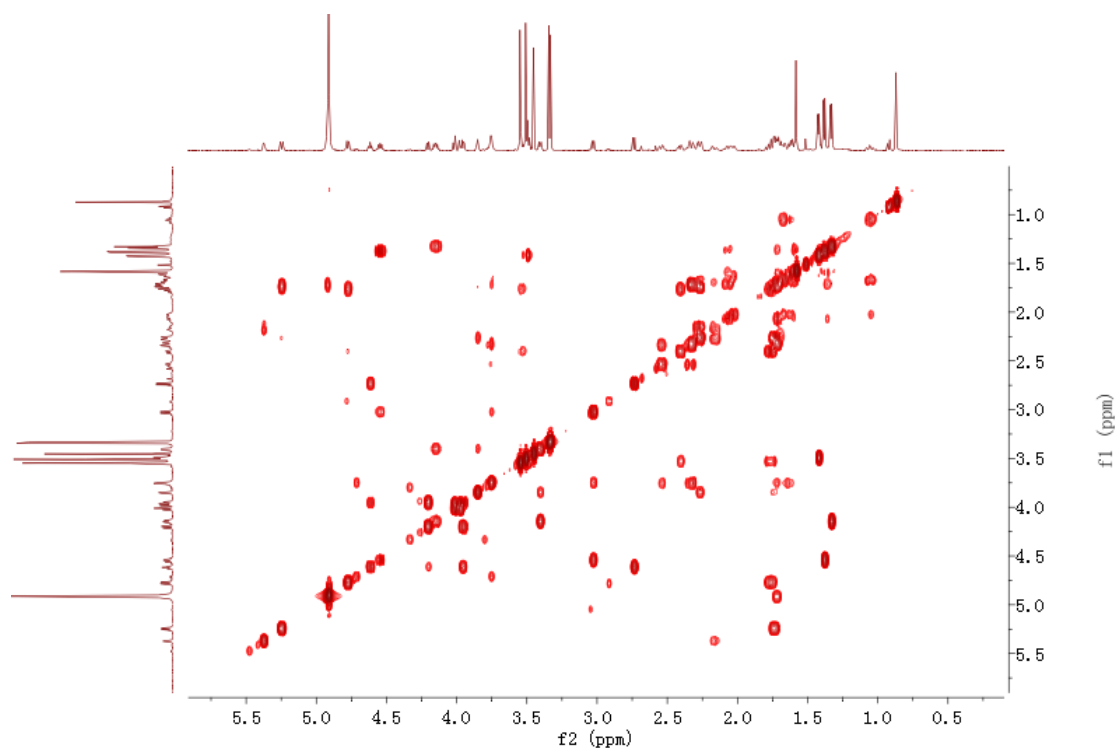

Figure S43  $^1\text{H}$ - $^1\text{H}$  COSY spectrum of compound **2b**

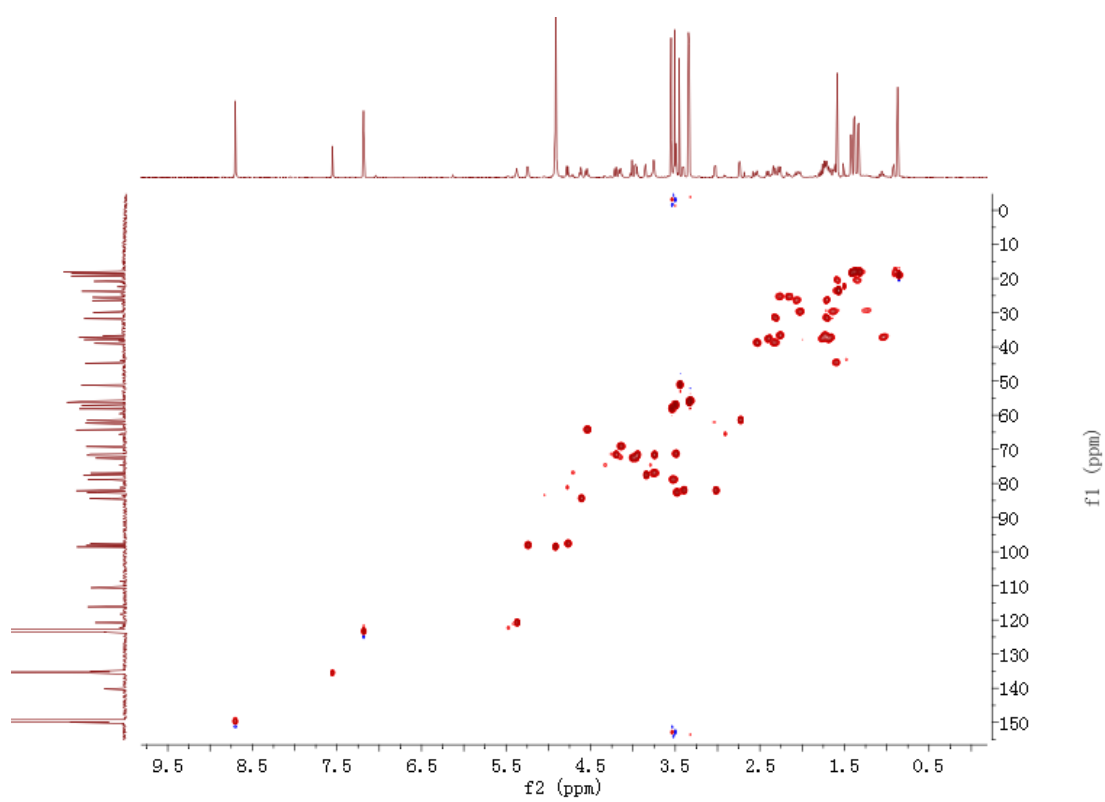

Figure S44 HSQC spectrum of compound **2b**

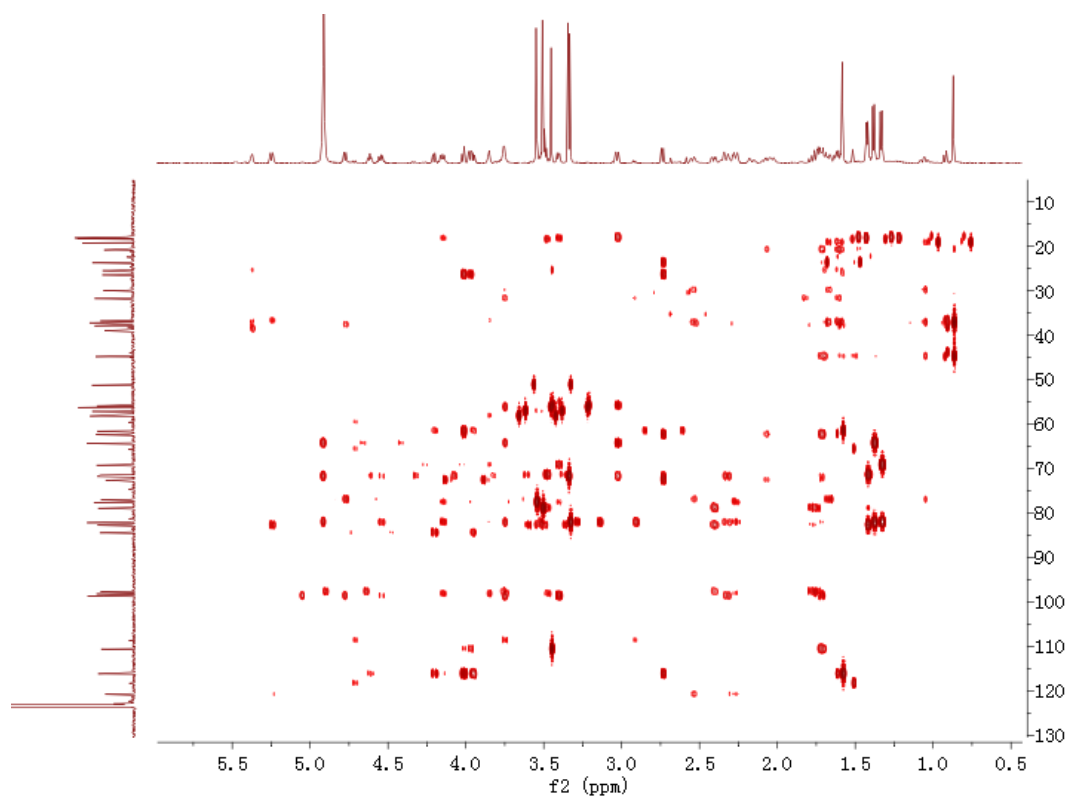

Figure S45 HMBC spectrum of compound **2b**

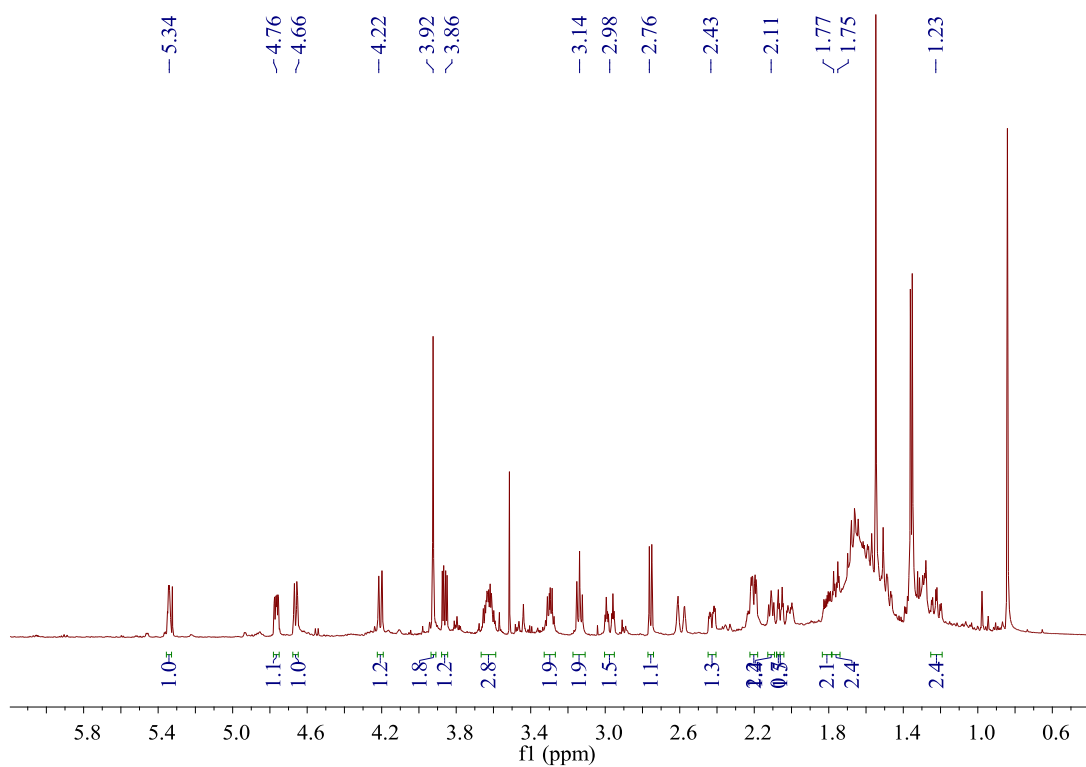

Figure S46  $^1\text{H}$  NMR spectrum of compound **2d**

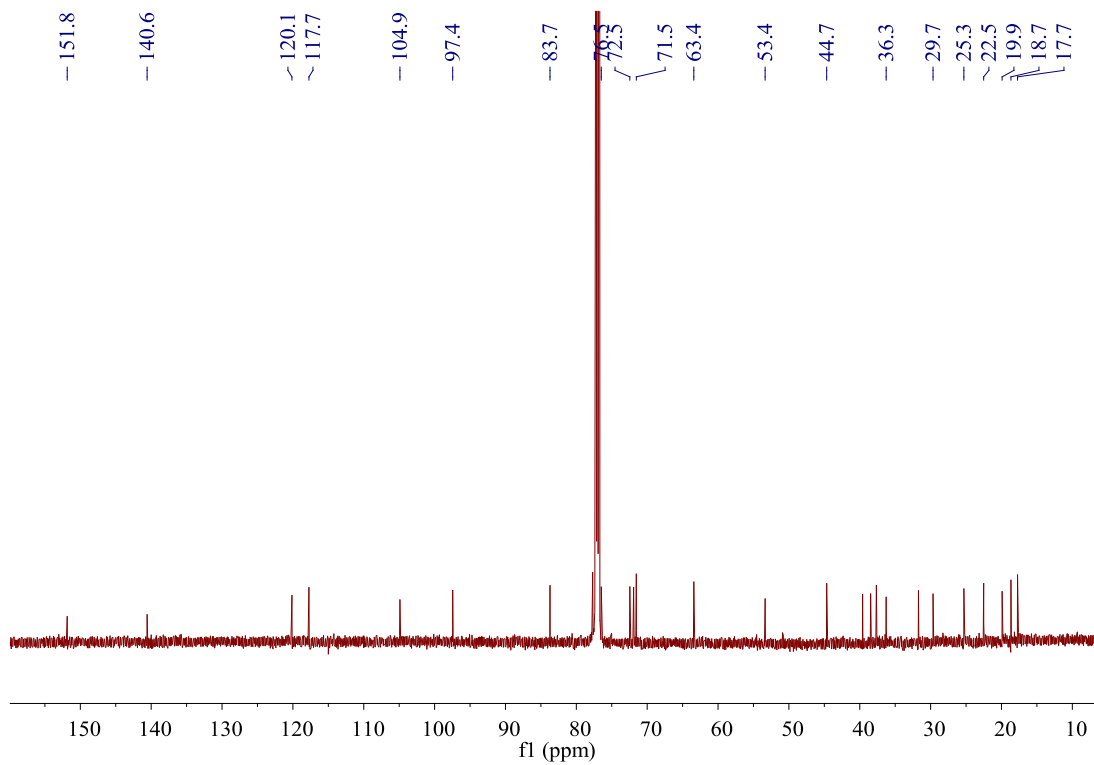

Figure S47  $^{13}\text{C}$  NMR spectrum of compound **2d**

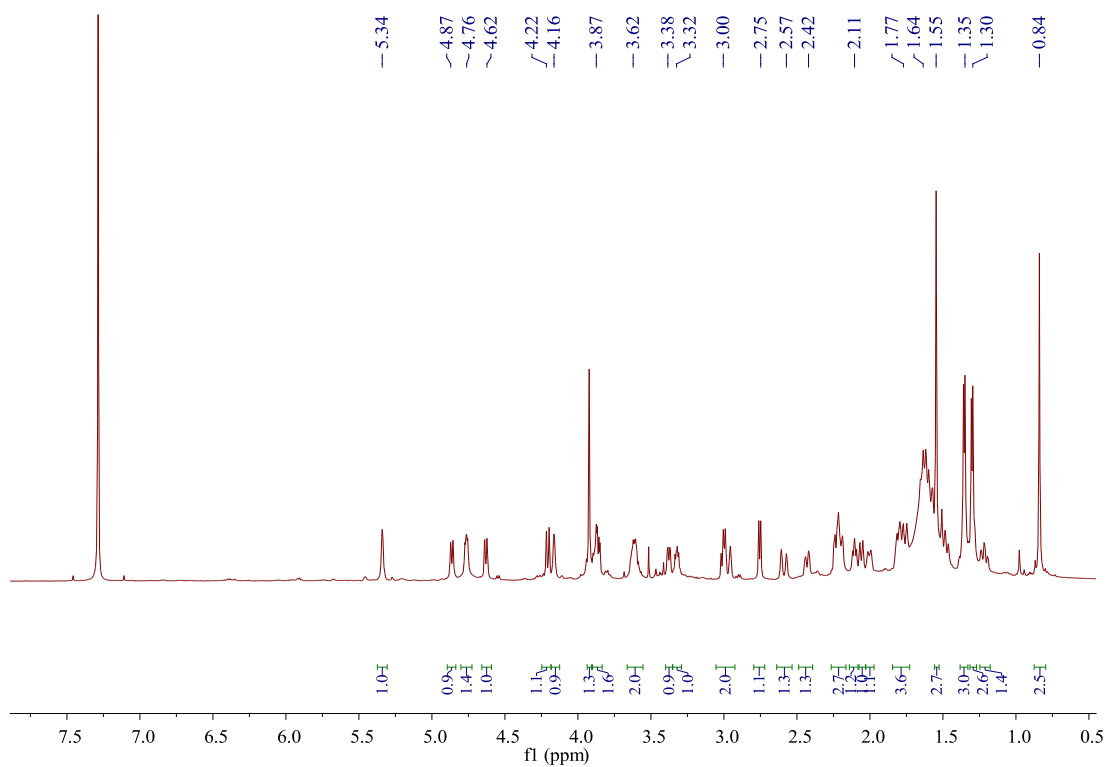

Figure S48  $^1\text{H}$  NMR spectrum of compound **2e**

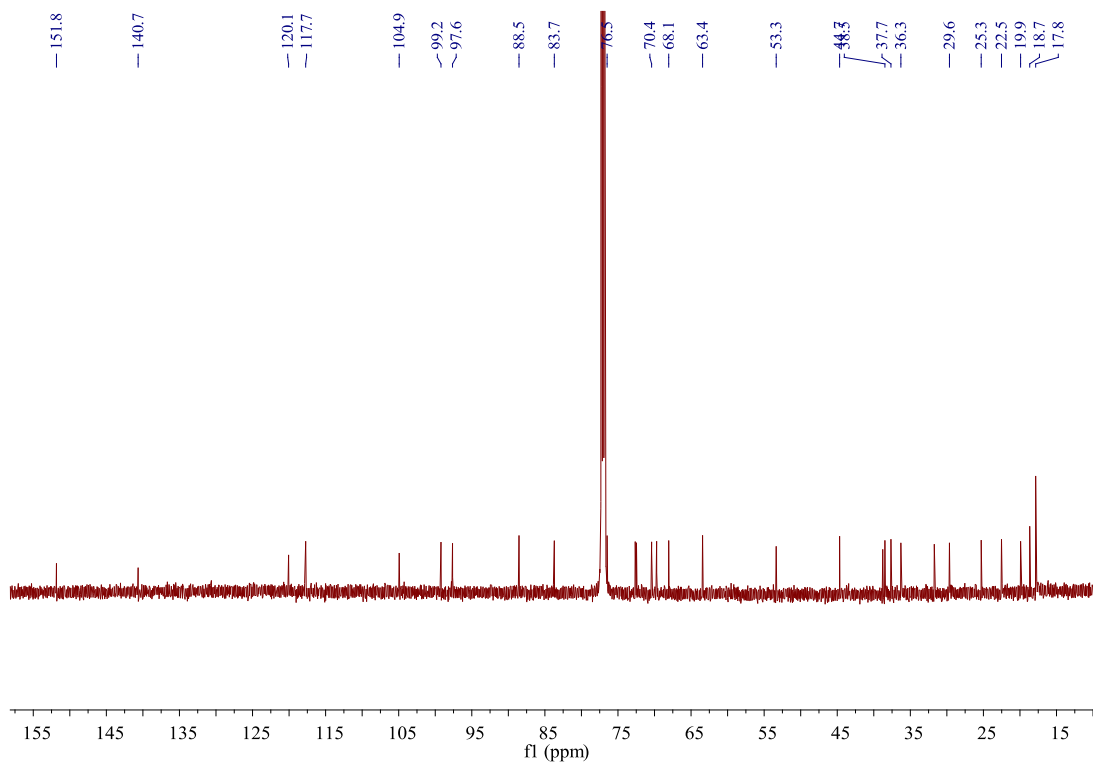

Figure S49  $^{13}\text{C}$  NMR spectrum of compound **2e**

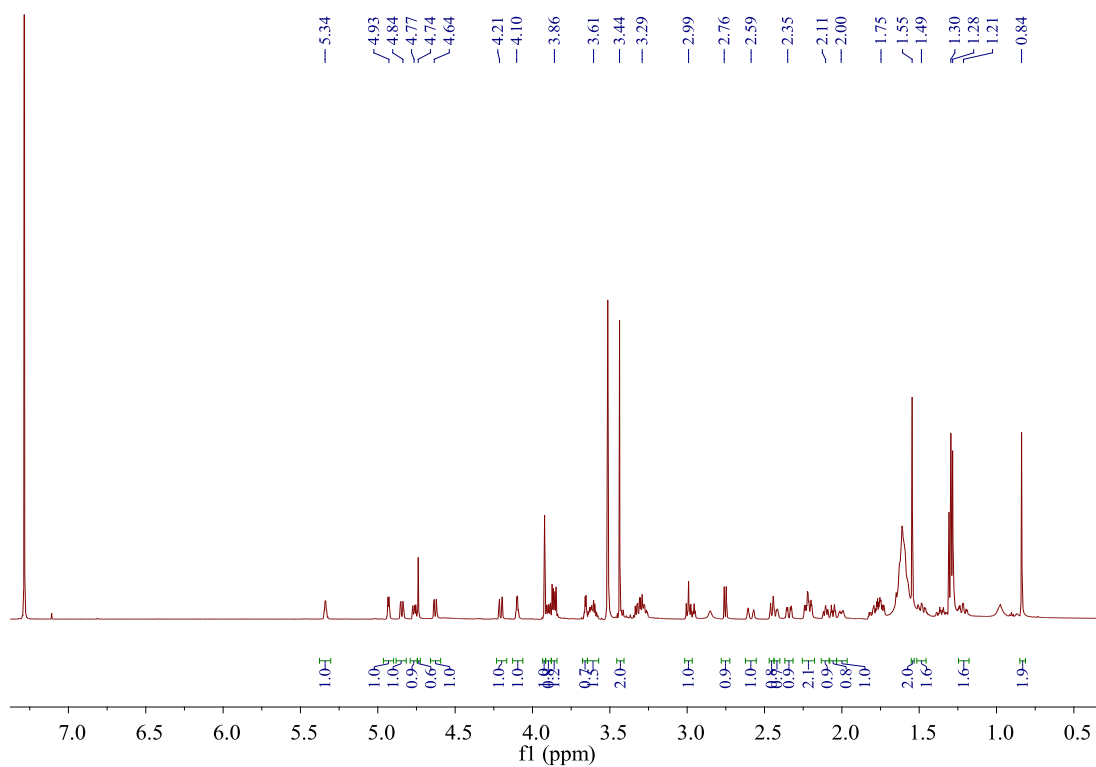

Figure S50  $^1\text{H}$  NMR spectrum of compound **2f**

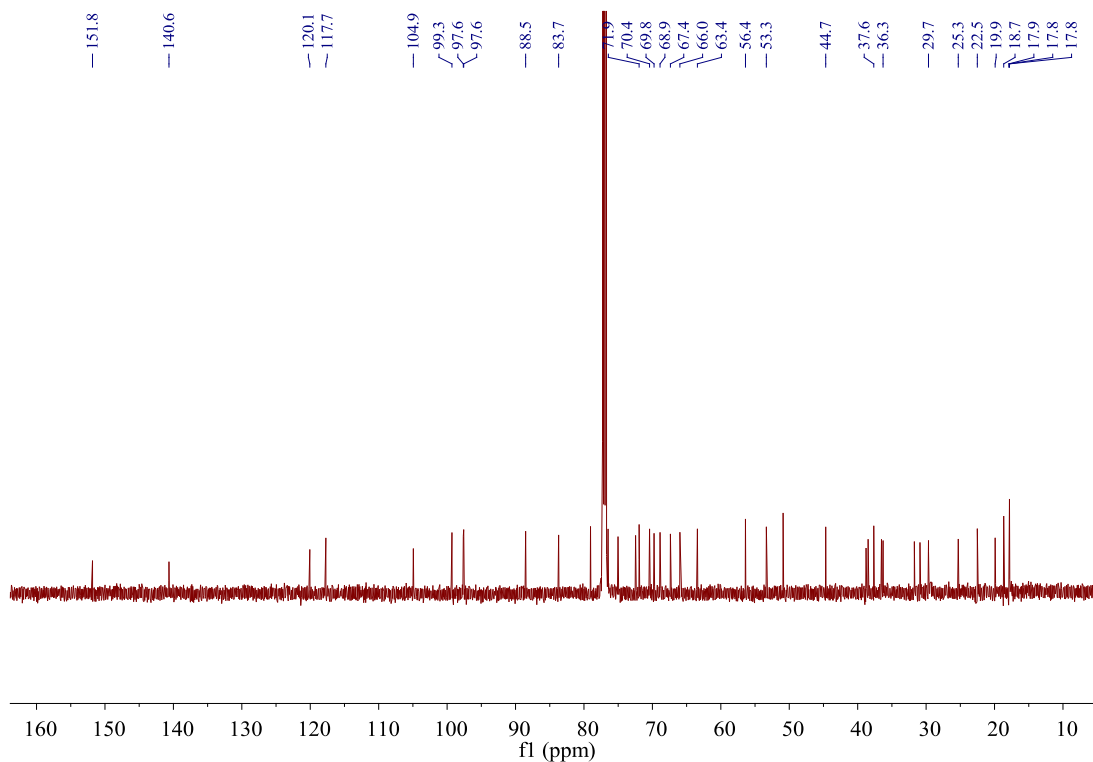

Figure S51  $^{13}\text{C}$  NMR spectrum of compound **2f**

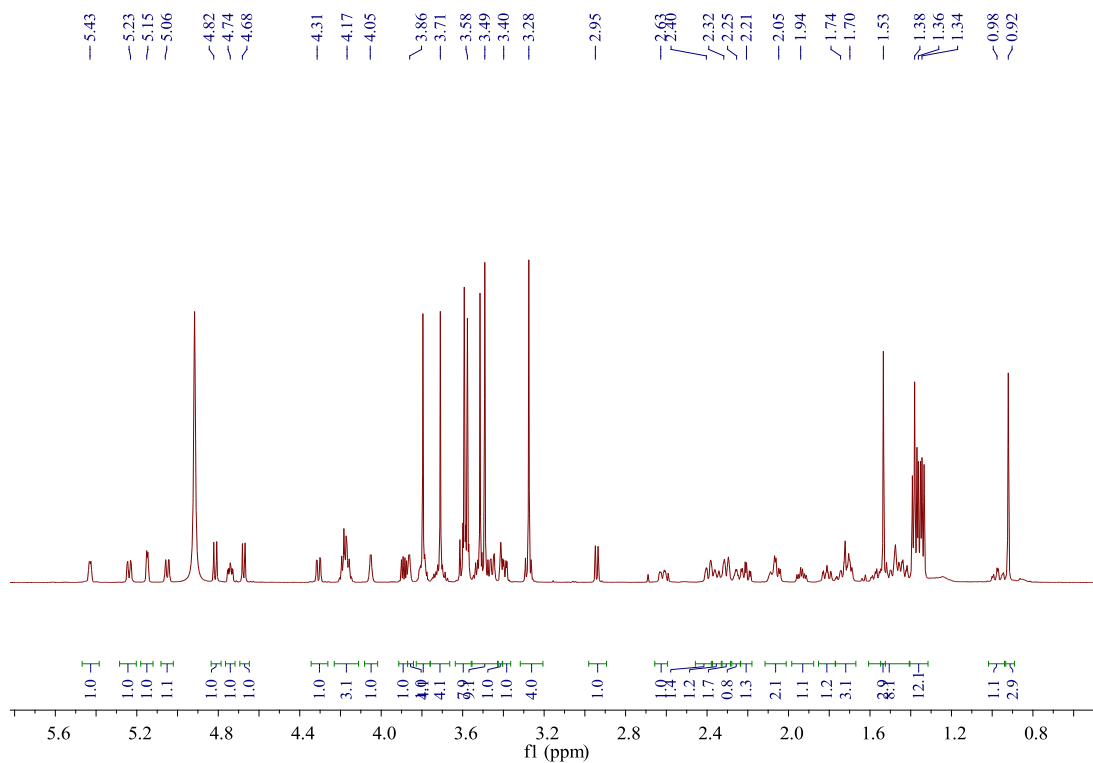

Figure S52  $^1\text{H}$  NMR spectrum of compound **6a**

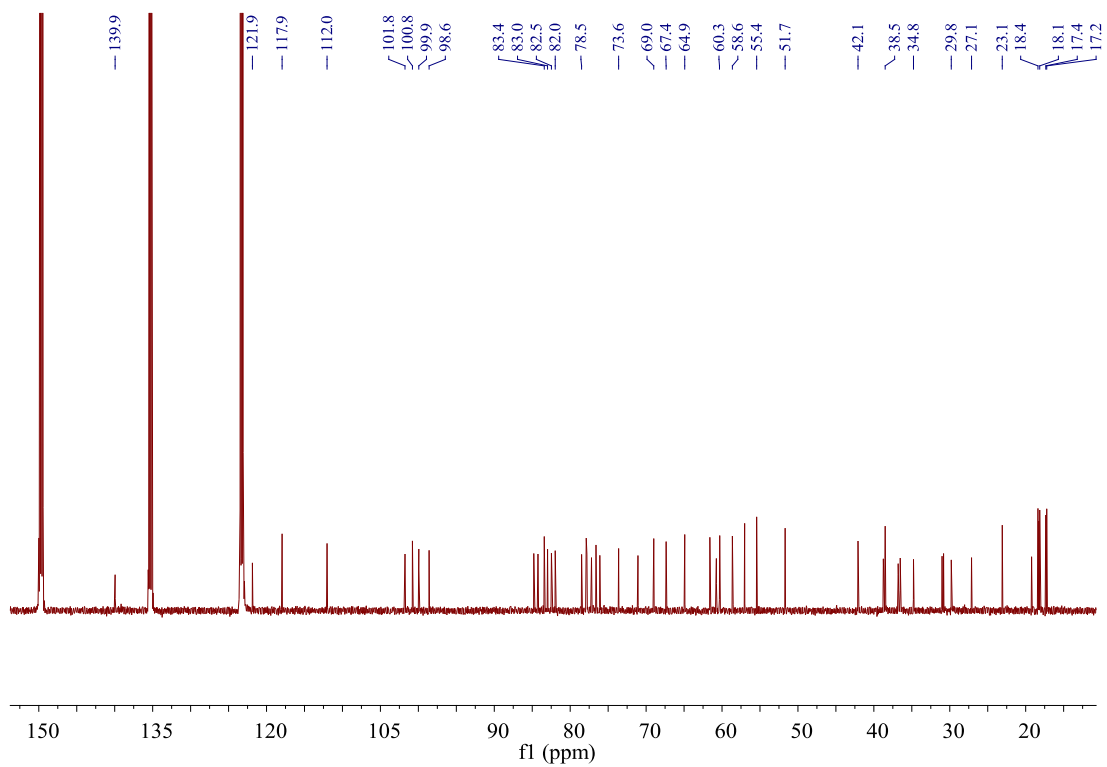

Figure S53  $^{13}\text{C}$  NMR spectrum of compound **6a**

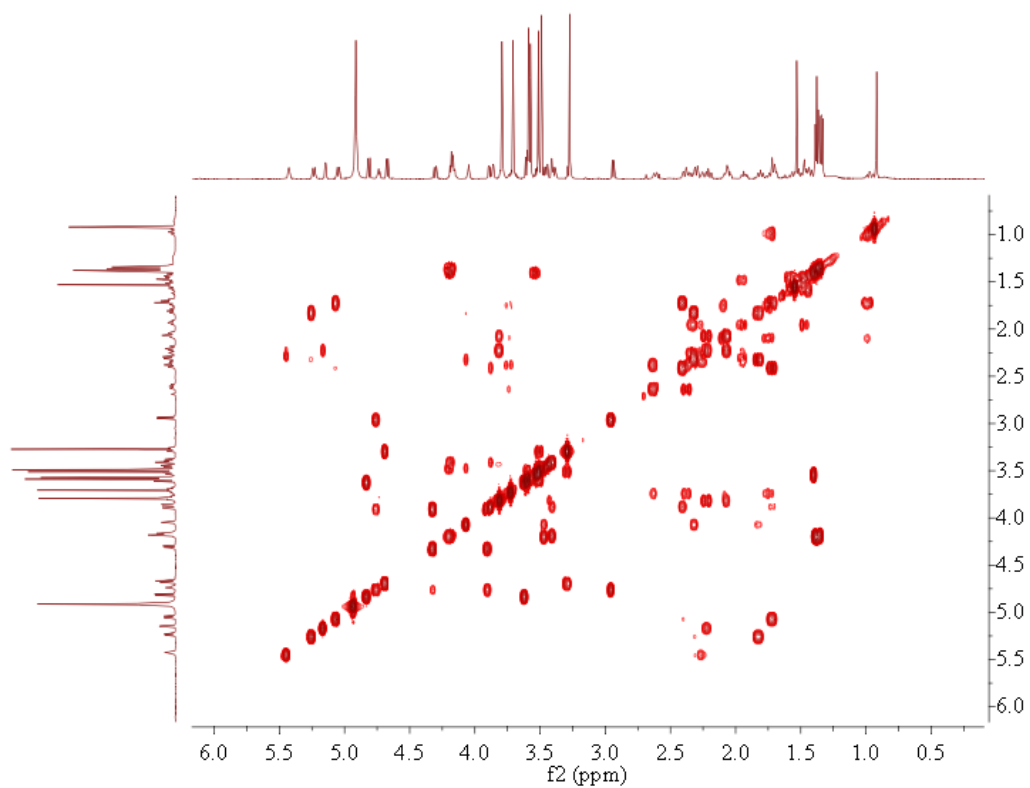

Figure S54  $^1\text{H}$ - $^1\text{H}$  COSY spectrum of compound **6a**

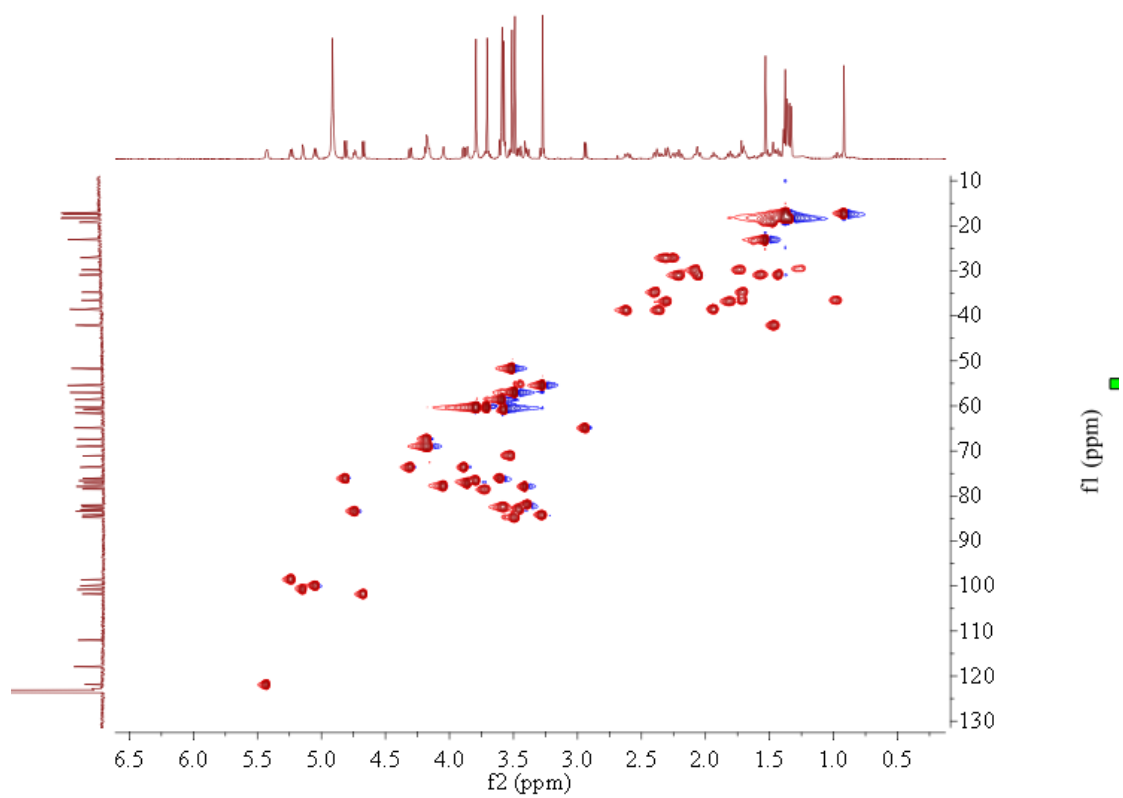

Figure S55 HSQC spectrum of compound **6a**

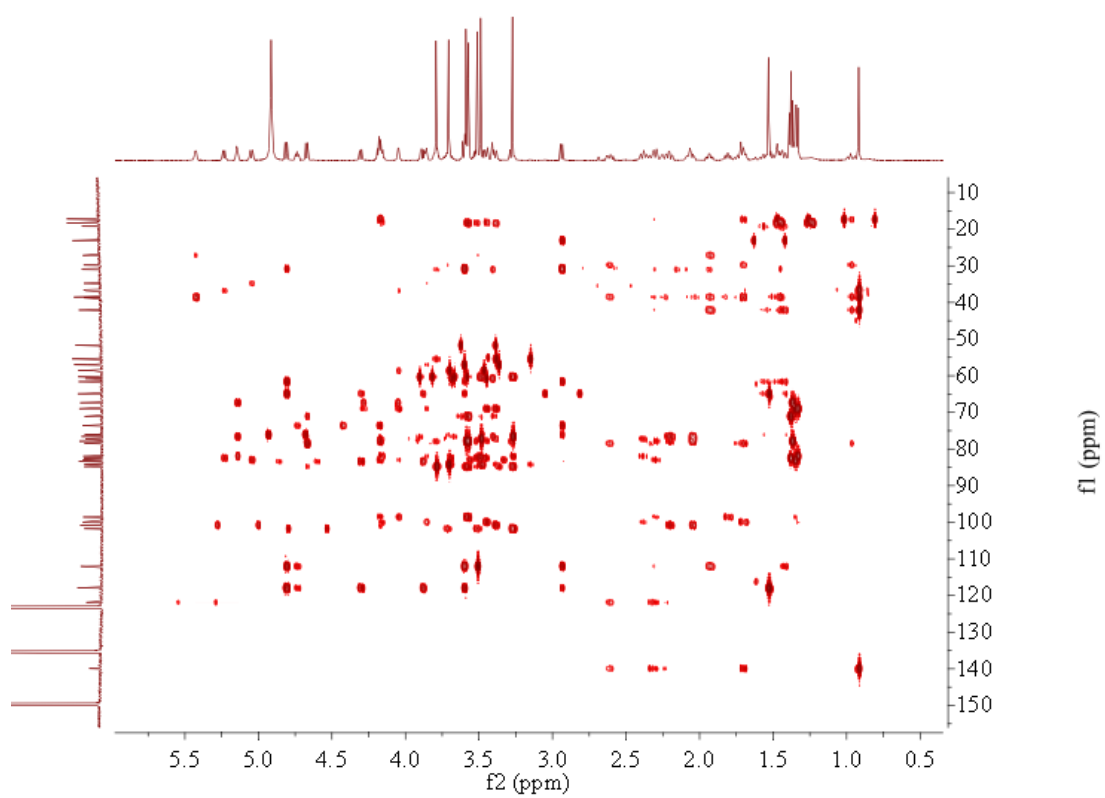

Figure S56 HMBC spectrum of compound **6a**

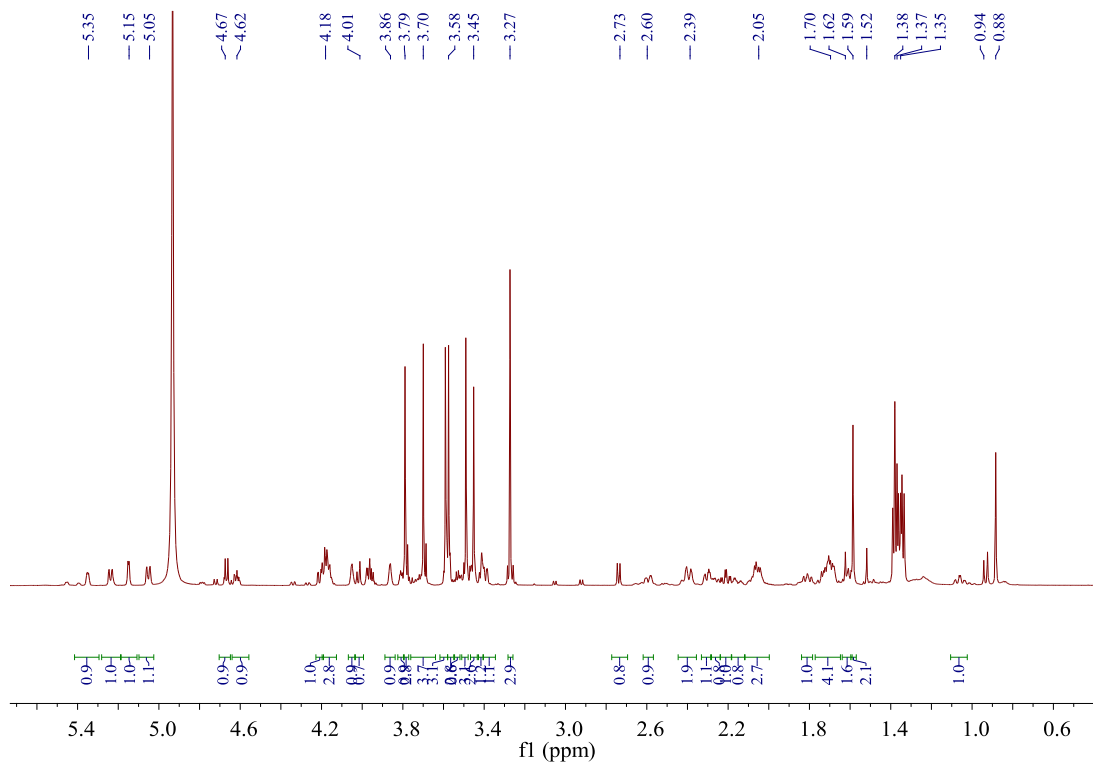

Figure S57  $^1\text{H}$  NMR spectrum of compound **6b**

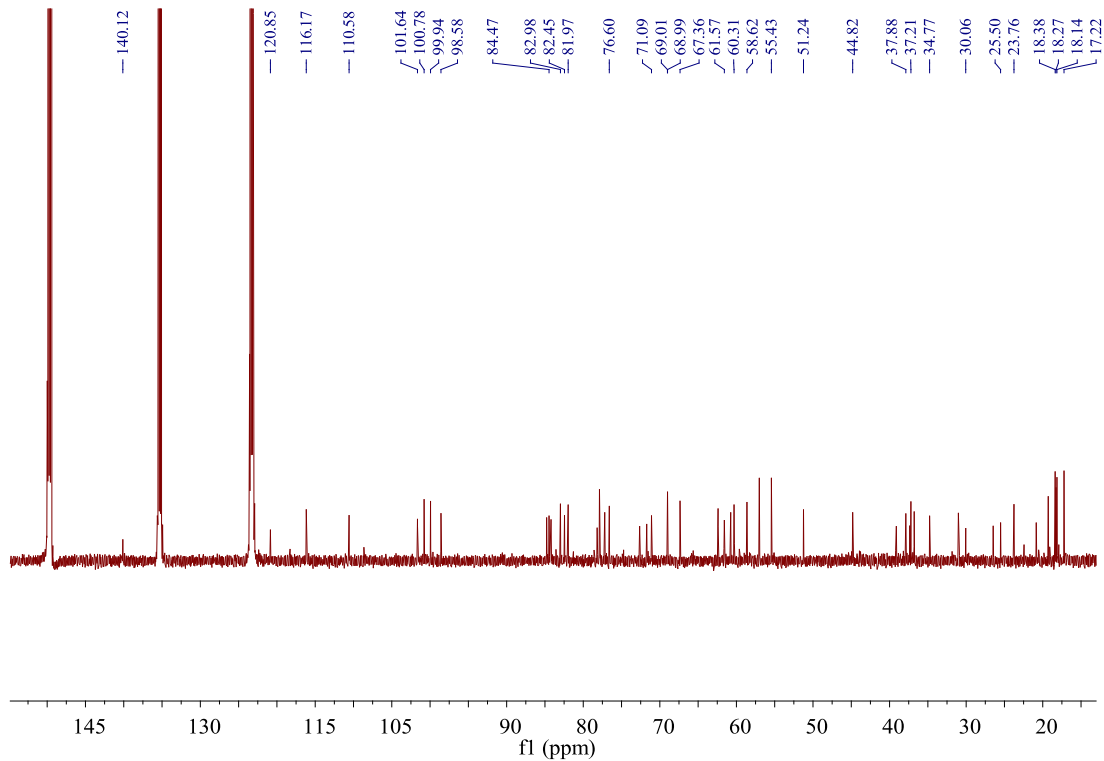

Figure S58  $^{13}\text{C}$  NMR spectrum of compound **6b**



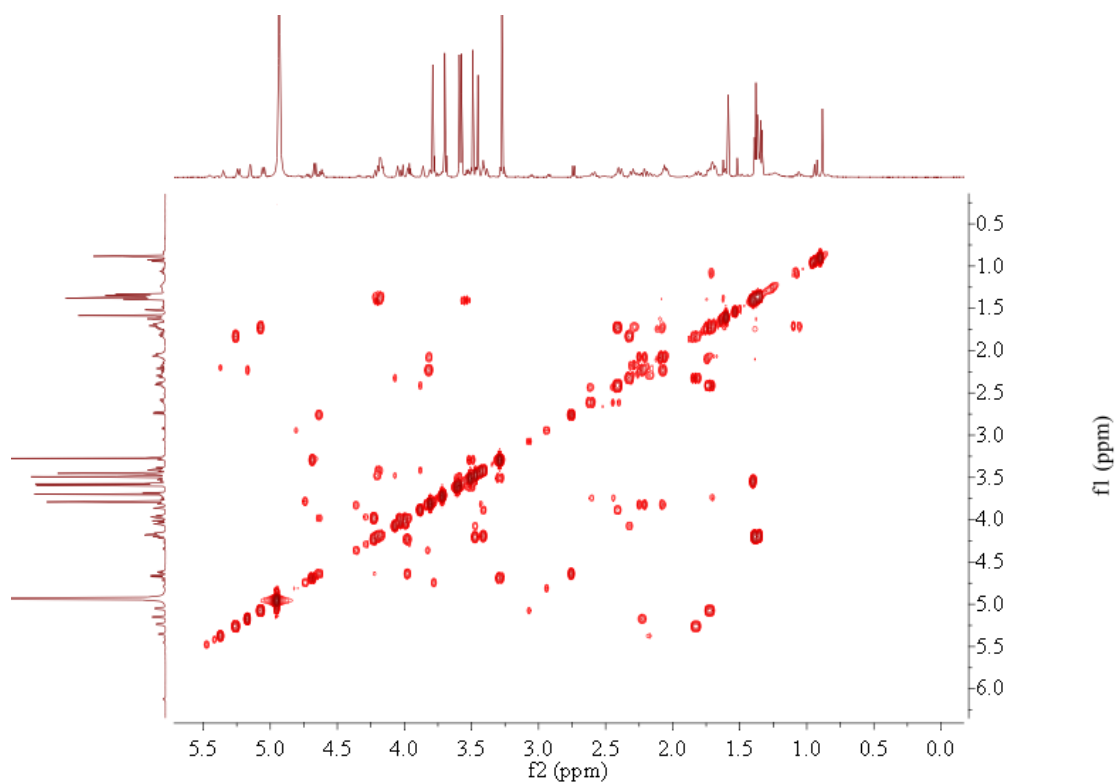

Figure S59  $^1\text{H}$ - $^1\text{H}$  COSY spectrum of compound **6b**

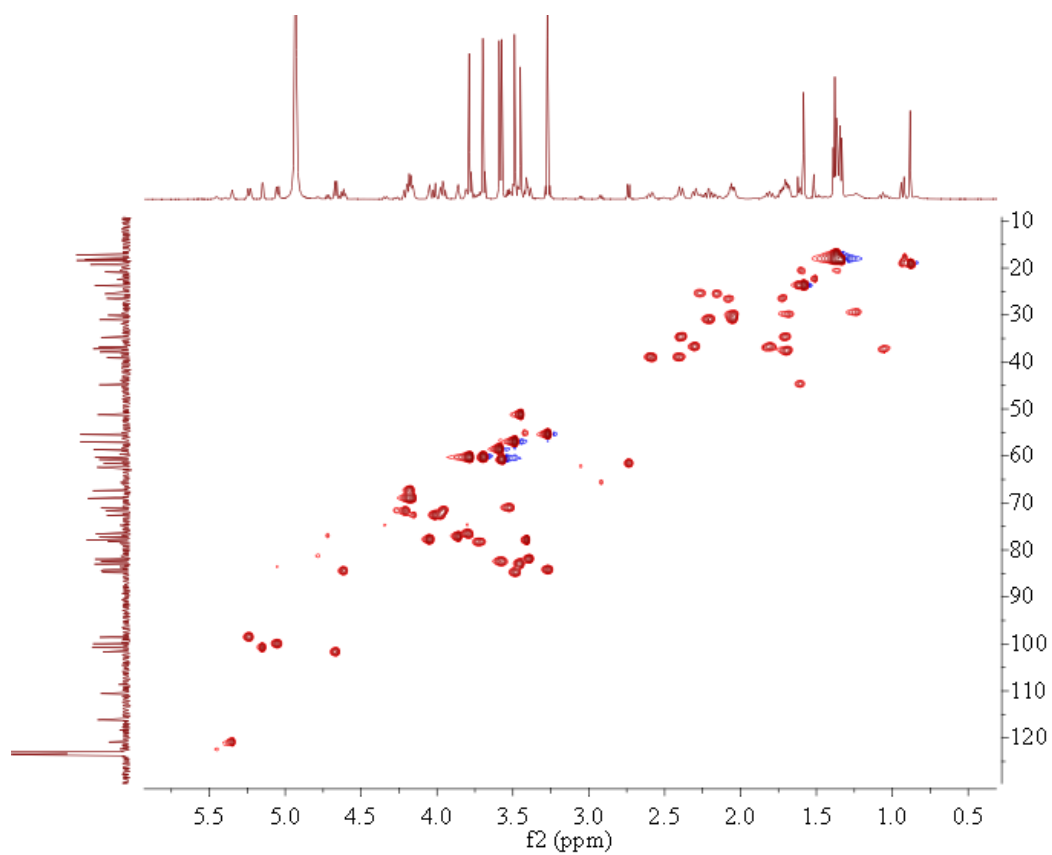

Figure S60 HSQC spectrum of compound **6b**

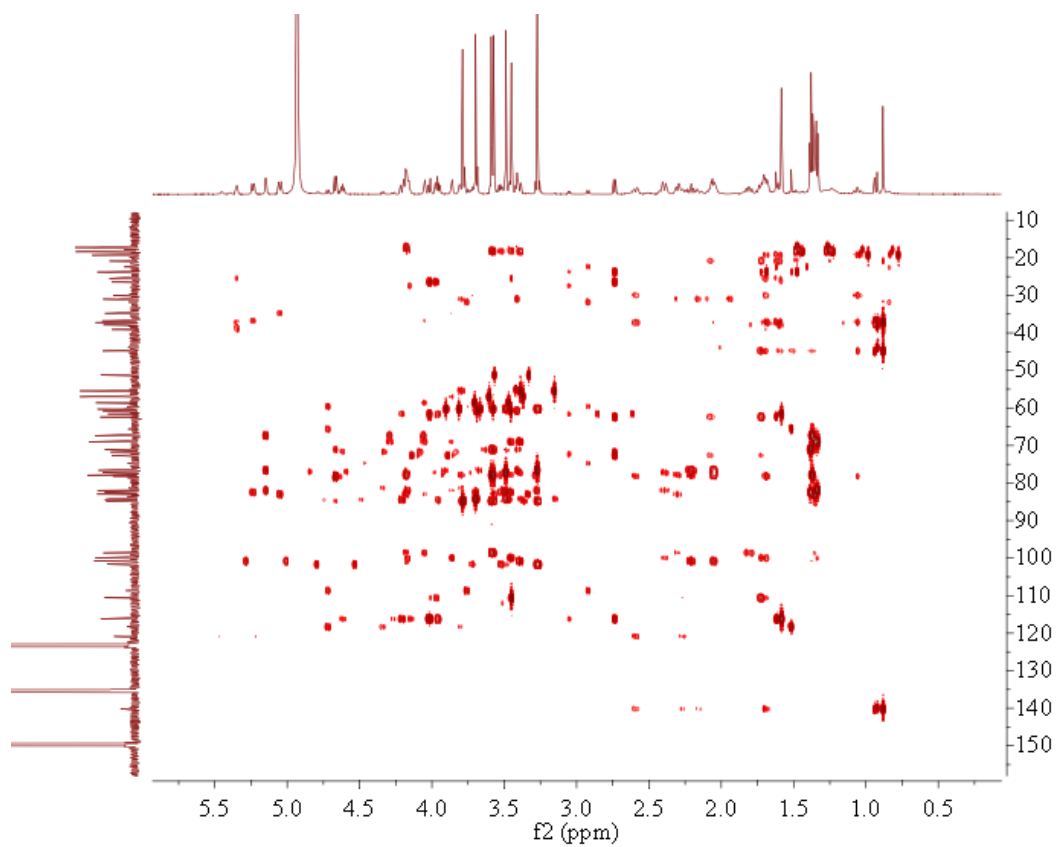

Figure S61 HMBC spectrum of compound **6b**

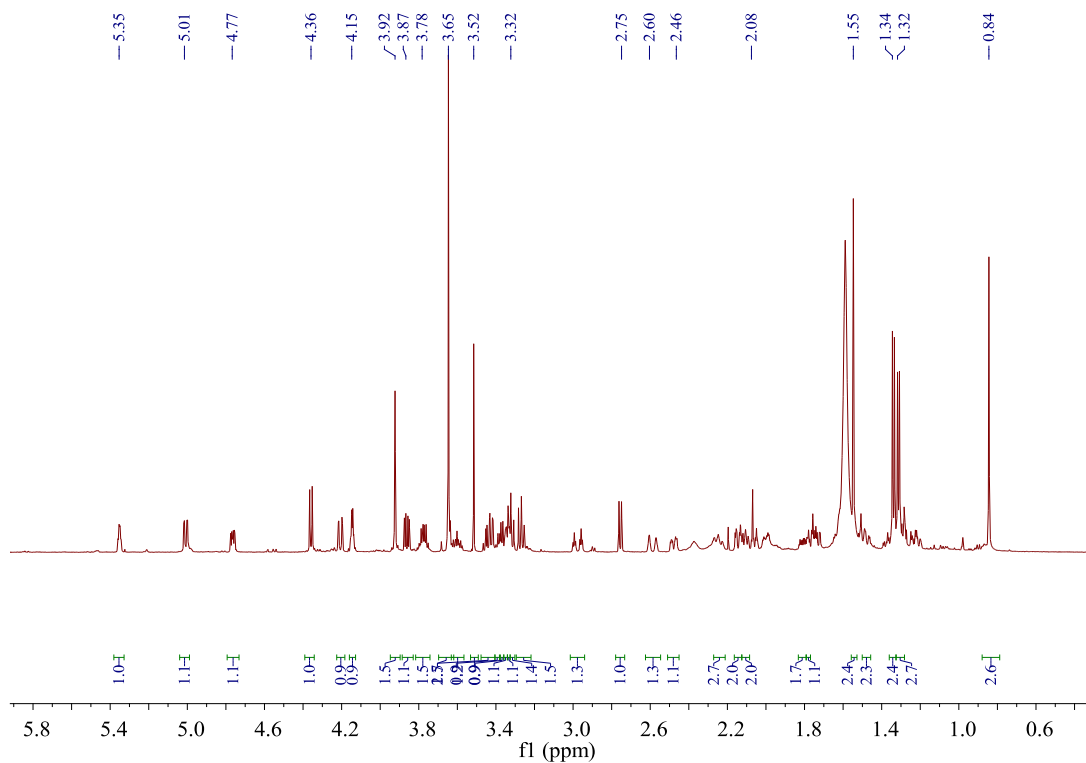

Figure S62  $^1\text{H}$  NMR spectrum of compound **6d**

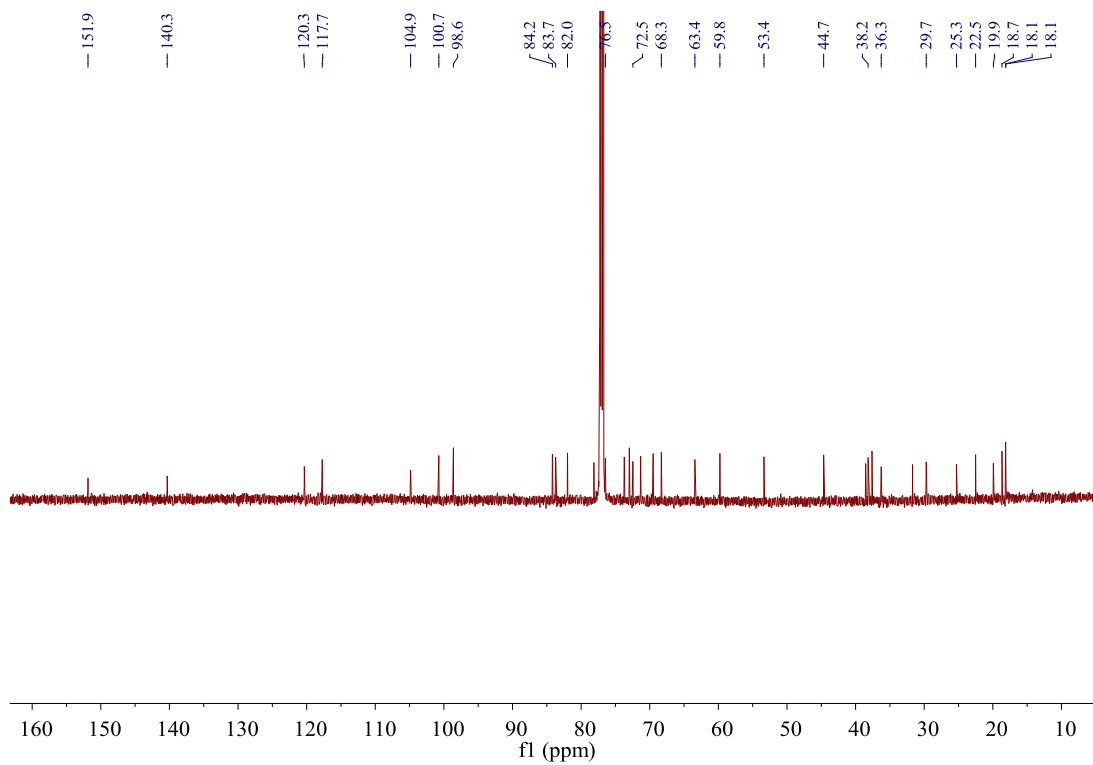

Figure S63  $^{13}\text{C}$  NMR spectrum of compound **6d**

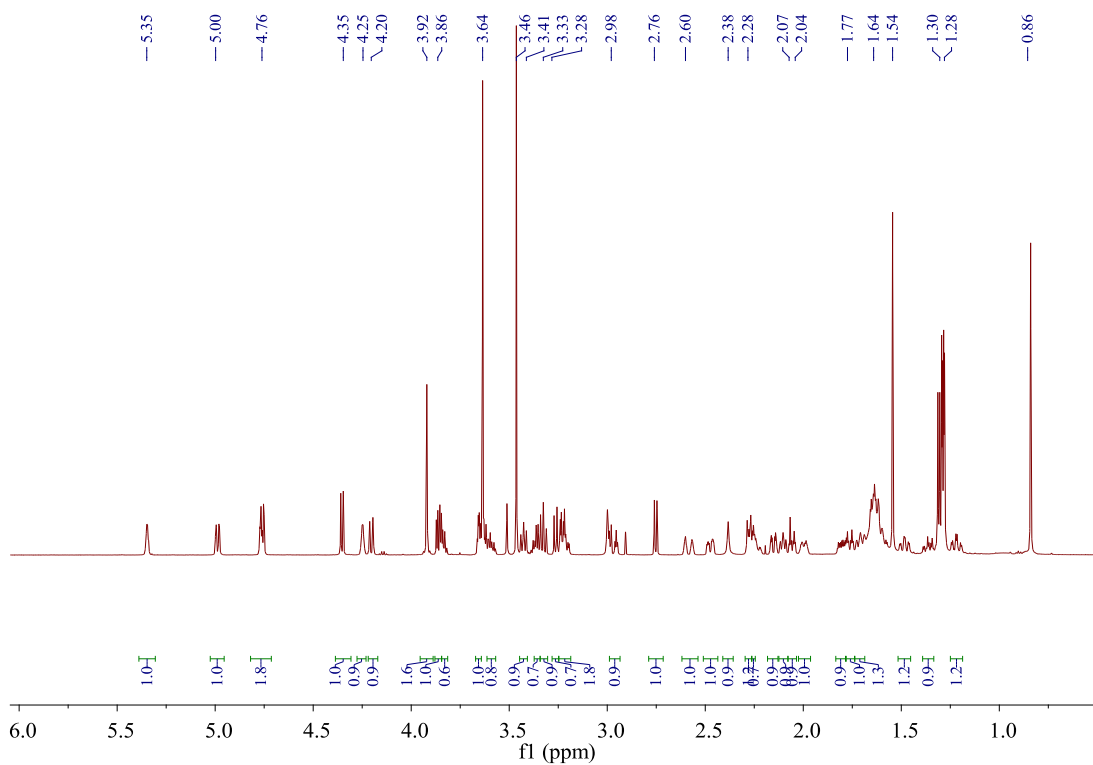

Figure S64  $^1\text{H}$  NMR spectrum of compound **6e**

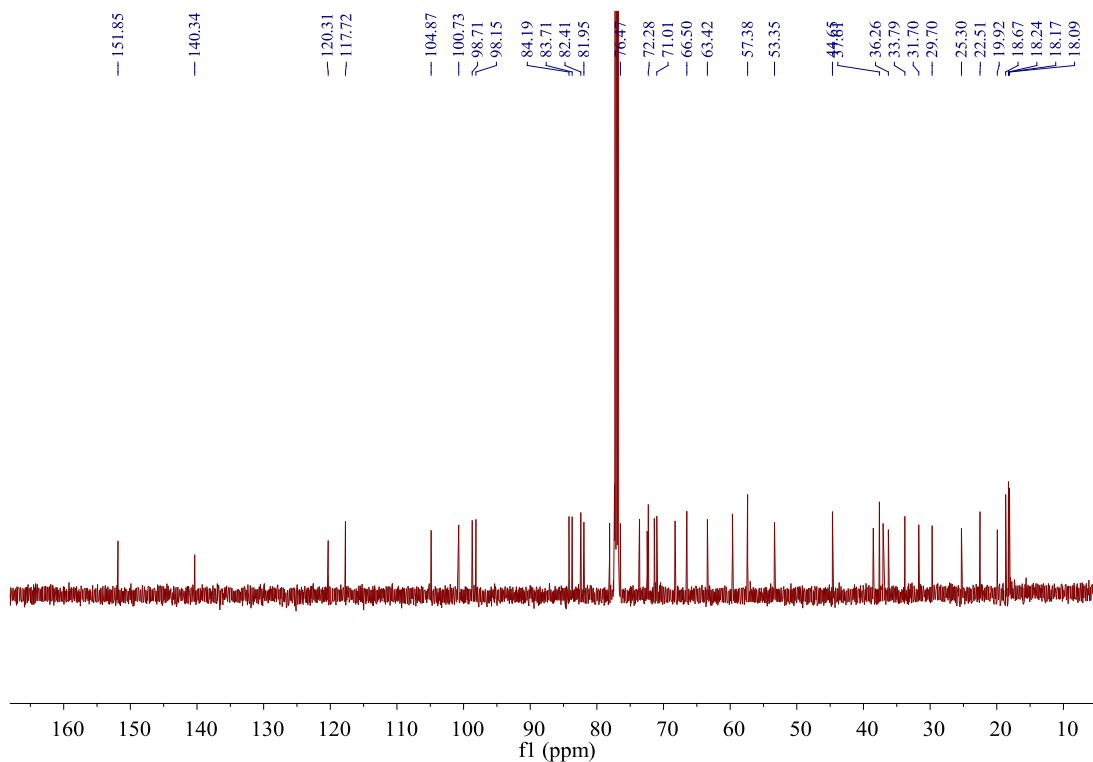

Figure S65  $^{13}\text{C}$  NMR spectrum of compound **6e**

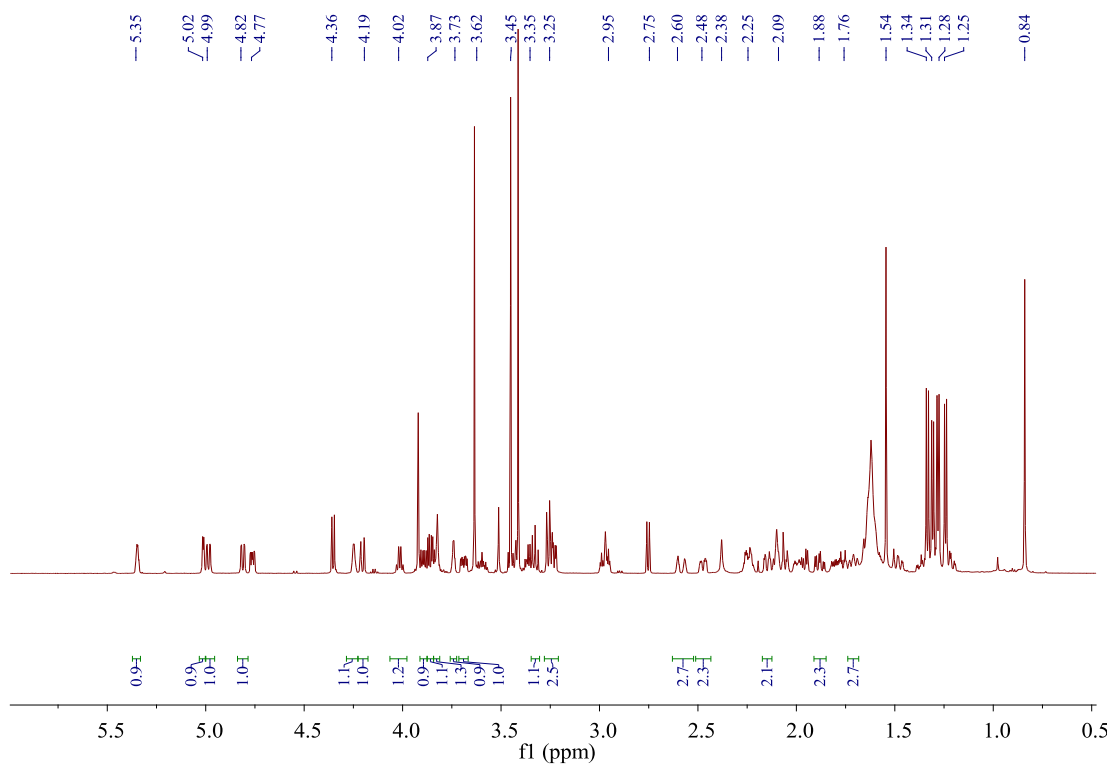

Figure S66  $^1\text{H}$  NMR spectrum of compound **6f**

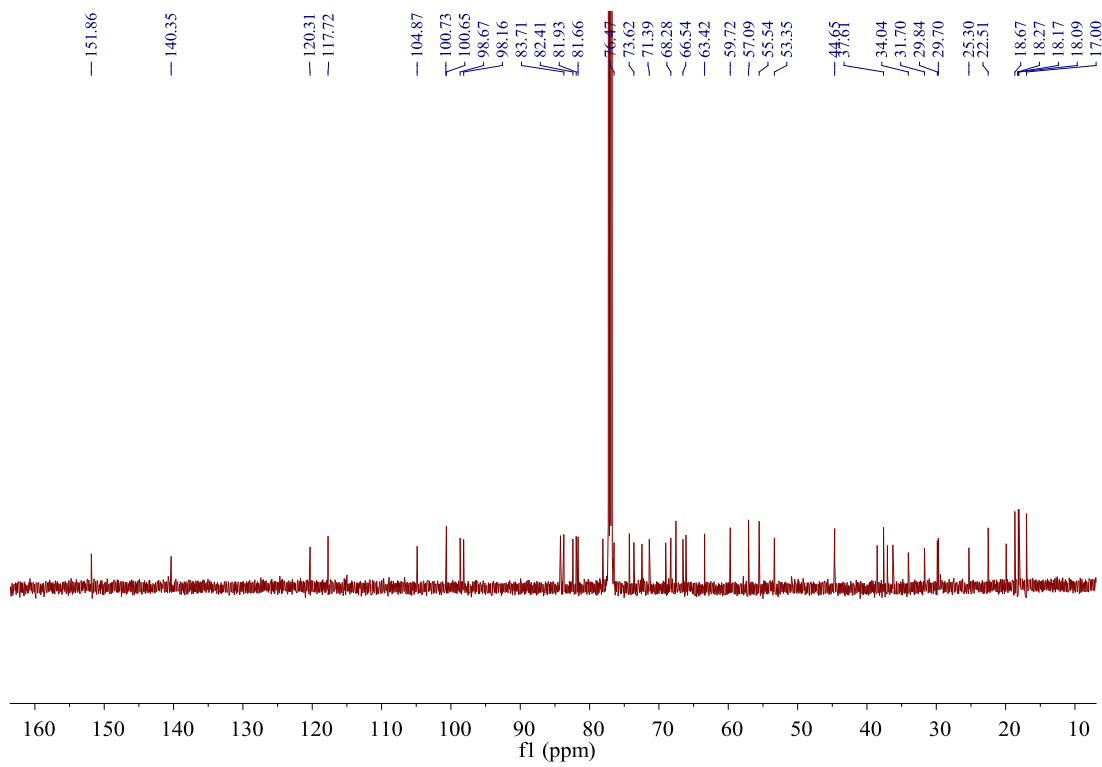

Figure S67  $^{13}\text{C}$  NMR spectrum of compound **6f**

Table S1 Assignment of <sup>1</sup>H NMR data for the aglycone part of compounds **2a-2f,6a-6f** in 600MHz (δ in ppm, *J* values in Hz)

| positon | <sup>a</sup> 2a               | <sup>a</sup> 2b   | <sup>b</sup> 2d   | <sup>b</sup> 2e                  | <sup>b</sup> 2f                  | <sup>a</sup> 6a          | <sup>a</sup> 6b                     | <sup>b</sup> 6c                  | <sup>b</sup> 6d                  | <sup>b</sup> 6e                                 | <sup>b</sup> 6f                 |
|---------|-------------------------------|-------------------|-------------------|----------------------------------|----------------------------------|--------------------------|-------------------------------------|----------------------------------|----------------------------------|-------------------------------------------------|---------------------------------|
| 1       | 2.26,m/1.71,<br>m             | 1.67,m/1.0<br>6,m | 1.77,m/1.2<br>2,m | 1.76,m/1.2<br>1,td(14.0,3<br>.3) | 1.77,m/1.2<br>1,td(14.1,3<br>.5) | 1.72,m/0.9<br>7,m        | 1.71,m/1.0<br>5,td(14.5,3<br>.7)    | 1.71,m/1.1<br>9,td(13.8,3<br>.6) | 1.78,m/1.2<br>2,m                | 1.76,dt(13.<br>6,3.6)/1.22<br>,td(13.9,4.<br>0) | 1.76,m/1.2<br>2,m               |
| 2       | 2.06,d(10.1)/<br>1.69,d(10.1) | 2.04,m/1.6<br>6,m | 2.01,m/1.5<br>8,m | 2.00,bd(12.<br>3)/1.58,m         | 2.00,m/1.2<br>9,m                | 2.07,m/1.7<br>3,m        | 2.05,m/1.7<br>1,m                   | 1.95,m/1.5<br>8,m                | 2.00,m/1.6<br>2,m                | 2.00,m/1.6<br>1,m                               | 2.00,m/1.6<br>1,m               |
| 3       | 3.76,m                        | 3.76,m            | 3.63,m            | 3.61,m                           | 3.61,m                           | 3.72,m                   | 3.72,m                              | 3.58,m                           | 3.60,m                           | 3.60,m                                          | 3.60,m                          |
| 4       | 2.57,m/2.28.<br>m             | 2.54,m/2.3<br>3,m | 2.43,m/2.2<br>0,m | 2.43,bd(14.<br>0)/2.21,m         | 2.43,bd(14.<br>4)/2.23,m         | 2.62,m/2.3<br>6,m        | 2.59,bd(13.<br>8)/2.39,bd(<br>13.3) | 2.44,m/1.7<br>6,m                | 2.48,m/2.2<br>5,m                | 2.47,dq(13.<br>7,2.1)/2.25<br>,m                | 2.47,d<br>like(14.1)/<br>2.25,m |
| 5       |                               |                   |                   |                                  |                                  |                          |                                     |                                  |                                  |                                                 |                                 |
| 6       | 5.45,m                        | 5.37.m            | 5.34,m            | 5.34,br s                        | 5.34,q(3.1)                      | 5.43,t(2.6)              | 5.43,t(2.5)                         | 5.32,q(2.3)                      | 5.35,q(2.3)                      | 5.35,q(2.4)                                     | 5.35,q(2.4)                     |
| 7       | 2.32,m/2.26,<br>m             | 2.27,m/2.1<br>7,m | 2.98,m/2.5<br>9,m | 2.97,m/bd<br>(21.0)              | 2.99,m/2.5<br>9,bd(21.1)         | 2.30,bd(13.<br>1)/2.26,m | 2.27,m/2.1<br>5,m                   | 2.93,m/2.5<br>8,m                | 2.98,dt(21.<br>0,3.7)/2.59<br>,m | 3.01,m/2.5<br>8,d<br>like(21.3)                 | 2.99,m/2.5<br>8,d<br>like(21.3) |
| 8       | 1.94,m                        | 2.03,m            |                   |                                  |                                  | 1.94,m                   | 1.69,m                              |                                  |                                  |                                                 |                                 |
| 9       | 1.47,m                        | 1.61,d(1.7)       | 2.11,m            | 2.10, t(8.2)                     | 2.11.t(8.3)                      | 1.47,m                   | 1.61,m                              | 2.07,m                           | 2.11,m                           | 2.10,bt(8.8<br>)                                | 2.10,m                          |
| 10      |                               |                   |                   |                                  |                                  |                          |                                     |                                  |                                  |                                                 |                                 |
| 11      | 1.49,m/1.47,<br>m             | 1.60,m/1.3<br>7,m | 1.81,m/1.3<br>6,m | 1.80,m/1.3<br>5,m                | 1.81,m/1.3<br>5,m                | 1.49,m/1.4<br>8,m        | 1.61,m/1.3<br>7,m                   | 1.79,m/1.3<br>3,m                | 1.81,m/1.3<br>7,m                | 1.81,m/1.3<br>6,m                               | 1.81,m/1.3<br>6,m               |
| 12      | 1.57,m/1.43,<br>m             | 2.07,m/1.7<br>2,m | 2.06,m/1.4<br>9,m | 2.06,bd(12.<br>3)/1.49,m         | 2.06,m/1.4<br>8,td(14.1,3        | 1.57,m/1.4<br>3,m        | 2.06,m/1.7<br>1,m                   | 2.02,m/1.4<br>7,m                | 2.06,m/1.4<br>9,m                | 2.06,dt<br>like(12.5,3.                         | 2.06,m/1.4<br>8,m               |

|    |                               |                              |                          |                                |                                     |                               |                          |                                     |                                     |                                     |                   |
|----|-------------------------------|------------------------------|--------------------------|--------------------------------|-------------------------------------|-------------------------------|--------------------------|-------------------------------------|-------------------------------------|-------------------------------------|-------------------|
|    |                               |                              |                          |                                | .5)                                 |                               |                          |                                     |                                     | 3)/1.48,td(13.1,3.4)                |                   |
| 13 |                               |                              |                          |                                |                                     |                               |                          |                                     |                                     |                                     |                   |
| 14 |                               |                              |                          |                                |                                     |                               |                          |                                     |                                     |                                     |                   |
| 15 | 4.31,dd(10.3,2.3)/3.90,q(4.3) | 4.21,dd(10.5,2.5)/3.95,m     | 4.21,dd(10.9,1.2)/3.86,m | 4.21,d(11.1)/3.86,dd(11.1,4.3) | 4.21,dd(11.1,1.2)/3.86,dd(10.8,4.6) | 4.31,dd(10.3,2.2)/3.88,q(5.4) | 4.21,dd(10.3,2.4)/3.95,m | 4.17,dd(10.9,1.0)/3.82,dd(10.8,4.4) | 4.21,dd(11.1,1.2)/3.86,dd(11.0,4.6) | 4.20,dd(10.9,1.2)/3.86,dd(10.9,4.4) | 4.20,dd(10.9,1.2) |
| 16 | 4.75,m                        | 4.62,m                       | 4.76,m                   | 4.76,m                         | 4.76,m                              | 4.74,m                        | 4.62,m                   | 4.73,m                              | 4.77,m                              | 4.76,m                              | 4.76,m            |
| 17 | 2.95,d(8.5)                   | 2.74,d(7.8)                  | 2.76,d(7.9)              | 2.76,d(7.8)                    | 2.75,d(8.0)                         | 2.94,d(8.0)                   | 2.74,d(8.0)              | 2.72,d(7.9)                         | 2.75,d(8.0)                         | 2.75,d(7.9)                         | 2.75,d(7.9)       |
| 18 | 4.81,d(9.0)/3.60,d(9.0)       | 4.02,d(8.6)/3.98,dd(7.0,1.6) | 3.92,br s                | 3.92,br s                      | 3.92,br s                           | 4.81,d(8.8)/3.61,d(8.8)       | 4.01,d(8.5)/3.97,m       | 3.88,br s                           | 3.92,br s                           | 3.92,br s                           | 3.92,br s         |
| 19 | 0.91,s                        | 0.87,s                       | 0.84,s                   | 0.84,s                         | 0.84,s                              | 0.92,s                        | 0.88,s                   | 0.80,s                              | 0.84,s                              | 0.84,s                              | 0.84,s            |
| 20 |                               |                              |                          |                                |                                     |                               |                          |                                     |                                     |                                     |                   |
| 21 | 1.54,s                        | 1.58,s                       | 1.55,s                   | 1.54,s                         | 1.54,s                              | 1.53,s                        | 1.59,s                   | 1.51,s                              | 1.59,s                              | 1.54,s                              | 1.54,s            |
| 22 | 3.52,s                        | 3.45,s                       |                          |                                |                                     | 3.51,s                        | 3.45,s                   |                                     |                                     |                                     |                   |

<sup>a</sup>Spectra in pyding-d5. <sup>b</sup>Spectra in CDCl<sub>3</sub>.

Table S2 Assignment of <sup>1</sup>H NMR data for the sugar chains of compounds **2a-2f,6a-6f** in 600MHz (δ in ppm, *J* values in Hz)

| position | <sup>a</sup> 2a | <sup>a</sup> 2b | <sup>b</sup> 2d | <sup>b</sup> 2e | <sup>b</sup> 2f | <sup>a</sup> 6a | <sup>a</sup> 6b | <sup>b</sup> 6c | <sup>b</sup> 6d | <sup>b</sup> 6e | <sup>b</sup> 6f |
|----------|-----------------|-----------------|-----------------|-----------------|-----------------|-----------------|-----------------|-----------------|-----------------|-----------------|-----------------|
|          | M-can           | M-can           | can             | can             | can             | M-the           | M-the           | the             | the             | the             | the             |
| 1'       | 4.79,dd(9.6     | 4.78,dd(9.7     | 4.66,dd(9.7     | 4.63,d(9.5)     | 4.63,dd(9.9     | 4.67,d(7.8)     | 4.67,d(7.8)     | 4.34,d(7.8)     | 4.36,d(7.8)     | 4.35            | 4.35,d(7.8)     |

|         |                      |                      |                   |                   |                      |                          |                          |             |                      |                                  |                      |
|---------|----------------------|----------------------|-------------------|-------------------|----------------------|--------------------------|--------------------------|-------------|----------------------|----------------------------------|----------------------|
|         | ,1.8)                | ,1.7)                | ,2.0)             |                   | ,1.7)                |                          |                          |             |                      | d(7.8)                           |                      |
| 2'      | 2,43,m/1.7<br>8,m    | 2,41,m/1.6<br>9,m    | 2,20,m/1.6<br>8,m | 2,21,m/1.6<br>3,m | 2,22,m/1.6<br>2,m    | 3,49,m                   | 3,49,m                   | 3,41,m      | 3,43,m               | 3,43,t(8.7)                      | 3,43,m               |
| 3'      | 3,56,m               | 3,53,m               | 3,64,m            | 3,62,m            | 3,63,m               | 3,28,m                   | 3,28,m                   | 3,12,q(8.9) | 3,27,t(8.7)          | 3,26,d(8.9)                      | 3,26,d(8.9)          |
| 4'      | 3,50,m               | 3,49,m               | 3,14,m            | 3,01,m            | 3,0,d(8.7)           | 3,58,overla<br>p         | 3,58,overla<br>p         | 3,20,t(8.9) | 3,33,m               | 3,33,m                           | 3,33,t(9.3)          |
| 5'      | 3,51,m               | 3,5,d(4.3)           | 3,31,m            | 3,32,m            | 3,33,m               | 3,53,m                   | 3,53,m                   | 3,34,m      | 3,38,m               | 3,36,m                           | 3,36, m              |
| 6'      | 1,43,d(5.3)          | 1,42,d(5.4)          | 1,36.d(6.1)       | 1,30,d(6.0)       | 1,28,bs              | 1,36,d(6.3)              | 1,36,d(6.3)              | 1,30,d(6.1) | 1,31,d(5.9)          | 1,31,d(6.0)                      | 1,31,d(5.9)          |
| 2'-OCH3 |                      |                      |                   |                   |                      | 3,80,s                   | 3,79,s                   |             |                      |                                  |                      |
| 3'-OCH3 | 3,53,s               | 3,51,s               |                   |                   |                      | 3,71,s                   | 3,70,s                   | 3,64,s      | 3,65,s               | 3,64,s                           | 3,64,s               |
|         | M-digt               | M-digt               | dig               | dig               | dig                  | M-digt                   | M-digt                   | dig         | dig                  | dig                              | dig                  |
| 1"      | 5,25,dd(9.8<br>,1.8) | 5,25,dd(9.6<br>,1.7) |                   | 4,86,d(9.6)       | 4,84,dd(9.8<br>,2.1) | 5,24,dd(9.8<br>,1.7)     | 5,23,dd(9.8<br>,1.7)     |             | 5,01,dd(9.7<br>,1.2) | 4,99,dd(9.7<br>,2.0)             | 4,99,dd(9.7<br>,2.0) |
| 2"      | 2,28,m/1.7<br>5,m    | 2,27,m/1.7<br>3,m    |                   | 2,21,m/1.7<br>9,m | 2,23,m/1.7<br>7,m    | 2,31,bd(13.<br>1)/1.81,m | 2,31,bd(13.<br>1)/1.81,m |             | 2,14,m/1.7<br>4,m    | 2,15,bd<br>like(13.9)/<br>1.71,m | 2,15,m/1.7<br>1,m    |
| 3"      | 3,86,m               | 3,85,m               |                   | 4,16,br s         | 4,10,d<br>like(3.2)  | 4,05,qd(2.8<br>)         | 4,05,qd(2.8<br>)         |             | 4,14,m               | 2,84,m                           | 3,86,dd(9.9<br>,4.5) |
| 4"      | 3,41,dd(9.7<br>,2.4) | 3,41,dd(9.5<br>,2.6) |                   | 3,38,d(9.0)       | 3,30,dd(9.5<br>,3.1) | 3,45,dd(9.5<br>,2.6)     | 3,45,dd(9.5<br>,2.6)     |             | 3,35,m               | 3,23,m                           | 3,23,dd(9.0<br>,3.1) |
| 5"      | 4,15,m               | 4,15,m               |                   | 3,88,m            | 3,90,m               | 4,18,m                   | 4,18,m                   |             | 3,78,m               | 3,64,m                           | 3,89,m               |
| 6"      | 1,34,d(6.2)          | 1,34,d(6.0)          |                   | 1,55,d(5.8)       | 1,29,bs              | 1,37,d(4.3)              | 1,37,d(4.3)              |             | 1,34,d(6.3)          | 1,28,d<br>(2.4)                  | 1,28,d(6.4)          |
| 3"-OCH3 | 3,55,s               | 3,55,s               |                   |                   |                      | 3,59,s                   | 3,59,s                   |             |                      |                                  |                      |
|         | M-cym                | M-cym                |                   |                   |                      | M-cym                    | M-cym                    |             |                      | cym                              | cym                  |
| 1'''    | 4,92,dd(4.8)         | 4,92,overla          |                   |                   | 4,93,d(3.9)          | 5,05,dd(9.8)             | 5,05,dd(9.8)             |             |                      | 4,76 ,                           | 4,81,dd(9.8)         |



|                        |                  |                  |  |  |                      |                      |                      |  |  |               |                  |
|------------------------|------------------|------------------|--|--|----------------------|----------------------|----------------------|--|--|---------------|------------------|
|                        | ,1.6)            | p                |  |  |                      | ,1.6)                | ,1.6)                |  |  | dd(9.6,1.2)   | ,2.0)            |
| 2 <sup>'''</sup>       | 2.34,m/1.34,m    | 2.33,m/1.71,m    |  |  | 2.34,bd(14.8)/1.75,m | 2.39,bd(12.8)/1.72,m | 2.39,bd(12.8)/1.72,m |  |  | 2.27,m/1.63,m | 2.25,m/1.65,m    |
| 3 <sup>'''</sup>       | 3.76,m           | 3.75,d(4.1)      |  |  | 3.66,m               | 3.86,qd(2.8)         | 3.86,qd(2.8)         |  |  | 3.65,m        | 3.74,q(2.7)      |
| 4 <sup>'''</sup>       | 3.04,dd(8.6,2.8) | 3.03,dd(8.7,2.9) |  |  | 3.28,m               | 3.39,dd(9.5,2.7)     | 3.39,dd(9.5,2.7)     |  |  | 3.22,m        | 3.26,dd(9.7,3.1) |
| 5 <sup>'''</sup>       | 4.55,m           | 4.55,m           |  |  | 3.87,m               | 4.18,m               | 4.18,m               |  |  | 4.25,q(2.8)   | 3.83,m           |
| 6 <sup>'''</sup>       | 1.38,d(6.4)      | 1.38,d(6.4)      |  |  | 1.31,bs              | 1.34,d(6.2)          | 1.34,d(6.2)          |  |  | 1.29,d(2.5)   | 1.24,d(6.3)      |
| 2 <sup>'''</sup> -OCH3 | 3.35,s           | 3.34,s           |  |  |                      |                      |                      |  |  |               |                  |
| 3 <sup>'''</sup> -OCH3 | 3.34,s           | 3.33,s           |  |  | 3.44,s               | 3.49,s               | 3.49,s               |  |  | 3.46,s        | 3.45,s           |
|                        |                  |                  |  |  |                      | M-dign               | M-dign               |  |  | dign          | dign             |
| 1 <sup>'''</sup>       |                  |                  |  |  |                      | 5.14,d(3.5)          | 5.15,d(3.5)          |  |  |               | 5.01,bd(3.7)     |
| 2 <sup>'''</sup>       |                  |                  |  |  |                      | 2.21,m/2.06,m        | 2.21,m/2.06,m        |  |  |               | 1.88,m/1.29,m    |
| 3 <sup>'''</sup>       |                  |                  |  |  |                      | 3.80,m               | 3.80,m               |  |  |               | 3.69,m           |
| 4 <sup>'''</sup>       |                  |                  |  |  |                      | 3.41,br s            | 3.41,br s            |  |  |               | 4.25,m           |
| 5 <sup>'''</sup>       |                  |                  |  |  |                      | 4.18,m               | 4.18,m               |  |  |               | 4.01,bd(7.0)     |
| 6 <sup>'''</sup>       |                  |                  |  |  |                      | 1.39,s               | 1.39,s               |  |  |               | 1.33,d(7.0)      |
| 3 <sup>'''</sup> -OCH3 |                  |                  |  |  |                      | 3.28,s               | 3.28,s               |  |  |               | 3.41,s           |
| 4 <sup>'''</sup> -OCH3 |                  |                  |  |  |                      | 3.58,s               | 3.58,s               |  |  |               |                  |

<sup>a</sup>Spectra in pyding-d5. <sup>b</sup>Spectra in CDCl<sub>3</sub>

Table S3 Assignment of  $^{13}\text{C}$  NMR data for compounds **2a-2f,6a-6f** in 150MHz ( $\delta$  in ppm)

| position | <sup>a</sup> 2a | <sup>a</sup> 2b | <sup>b</sup> 2c | <sup>b</sup> 2d | <sup>b</sup> 2e | <sup>b</sup> 2f | <sup>a</sup> 6a | <sup>a</sup> 6b | <sup>b</sup> 6c | <sup>b</sup> 6d | <sup>b</sup> 6e | <sup>b</sup> 6f |
|----------|-----------------|-----------------|-----------------|-----------------|-----------------|-----------------|-----------------|-----------------|-----------------|-----------------|-----------------|-----------------|
| 1        | 36.5            | 37.4            | 36.4            | 36.3            | 36.3            | 36.3            | 36.5            | 37.4            | 36.3            | 36.3            | 36.3            | 36.3            |
| 2        | 29.7            | 30.0            | 31.9            | 29.7            | 29.7            | 29.7            | 29.8            | 30.1            | 29.8            | 29.7            | 29.7            | 29.7            |
| 3        | 77.3            | 77.0            | 71.3            | 77.2            | 77.2            | 77.2            | 78.5            | 78.2            | 78.3            | 78.1            | 78.1            | 78.1            |
| 4        | 38.6            | 39.0            | 42.1            | 38.5            | 38.5            | 38.5            | 38.8            | 39.1            | 38.6            | 38.5            | 38.5            | 38.5            |
| 5        | 140.0           | 140.2           | 140.8           | 140.6           | 140.7           | 140.7           | 140.0           | 140.1           | 140.3           | 140.3           | 140.3           | 140.4           |
| 6        | 121.8           | 120.8           | 120.2           | 120.1           | 120.1           | 120.1           | 121.9           | 120.9           | 120.5           | 120.3           | 120.3           | 120.3           |
| 7        | 27.1            | 25.5            | 25.4            | 25.3            | 25.3            | 25.3            | 27.1            | 25.5            | 25.4            | 25.3            | 25.3            | 25.3            |
| 8        | 38.5            | 37.8            | 105.1           | 104.9           | 104.9           | 104.9           | 38.5            | 37.9            | 105.0           | 104.6           | 104.9           | 104.9           |
| 9        | 42.1            | 44.8            | 44.8            | 44.7            | 44.7            | 44.7            | 42.1            | 44.8            | 44.7            | 44.7            | 44.7            | 44.7            |
| 10       | 38.5            | 37.2            | 37.5            | 37.7            | 37.7            | 37.7            | 38.5            | 37.2            | 37.7            | 37.6            | 37.6            | 37.6            |
| 11       | 19.2            | 20.8            | 20.1            | 19.9            | 19.9            | 19.9            | 19.2            | 20.9            | 20.0            | 19.9            | 19.9            | 19.9            |
| 12       | 30.8            | 26.5            | 31.9            | 31.7            | 31.7            | 31.7            | 30.8            | 26.5            | 31.8            | 31.7            | 31.7            | 31.7            |
| 13       | 61.6            | 62.4            | 53.5            | 53.4            | 53.4            | 53.4            | 61.6            | 62.4            | 53.5            | 53.4            | 53.4            | 53.4            |
| 14       | 112.1           | 110.6           | 151.9           | 151.9           | 151.8           | 151.8           | 112.1           | 110.6           | 151.9           | 151.9           | 151.9           | 151.9           |
| 15       | 73.6            | 71.7            | 72.6            | 72.5            | 72.5            | 72.5            | 73.6            | 71.7            | 72.5            | 72.5            | 72.5            | 72.5            |
| 16       | 83.4            | 84.5            | 83.9            | 83.7            | 83.7            | 83.7            | 83.4            | 84.5            | 83.8            | 83.7            | 83.7            | 83.7            |
| 17       | 64.9            | 61.6            | 63.6            | 63.4            | 63.4            | 63.4            | 65.0            | 61.6            | 63.5            | 63.4            | 63.4            | 63.4            |
| 18       | 76.1            | 72.6            | 76.6            | 76.5            | 76.5            | 76.5            | 76.1            | 72.6            | 76.5            | 76.5            | 76.5            | 76.5            |
| 19       | 17.3            | 19.2            | 18.9            | 18.7            | 18.7            | 18.7            | 17.3            | 19.3            | 18.8            | 18.7            | 18.7            | 18.7            |
| 20       | 118.0           | 116.1           | 117.7           | 117.7           | 117.7           | 117.7           | 118.0           | 116.2           | 117.9           | 117.7           | 117.7           | 117.7           |
| 21       | 23.1            | 23.7            | 22.6            | 22.5            | 22.5            | 22.5            | 23.1            | 23.8            | 22.6            | 22.5            | 22.5            | 22.5            |
| 22       | 51.7            | 51.2            |                 |                 |                 |                 | 51.7            | 51.2            |                 |                 |                 |                 |



|                        |      |      |  |  |  |      |        |        |  |  |      |       |
|------------------------|------|------|--|--|--|------|--------|--------|--|--|------|-------|
| 3 <sup>'''</sup> -OCH3 | 55.9 | 55.9 |  |  |  | 56.4 | 57.0   | 57.0   |  |  | 57.4 | 57.1  |
|                        |      |      |  |  |  |      | M-dign | M-dign |  |  |      | dign  |
| 1 <sup>'''</sup>       |      |      |  |  |  |      | 100.8  | 100.8  |  |  |      | 100.7 |
| 2 <sup>'''</sup>       |      |      |  |  |  |      | 31.0   | 31.0   |  |  |      | 29.8  |
| 3 <sup>'''</sup>       |      |      |  |  |  |      | 76.6   | 76.6   |  |  |      | 74.3  |
| 4 <sup>'''</sup>       |      |      |  |  |  |      | 77.9   | 77.9   |  |  |      | 66.5  |
| 5 <sup>'''</sup>       |      |      |  |  |  |      | 67.4   | 67.4   |  |  |      | 66.1  |
| 6 <sup>'''</sup>       |      |      |  |  |  |      | 17.2   | 17.2   |  |  |      | 17.0  |
| 3 <sup>'''</sup> -OCH3 |      |      |  |  |  |      | 55.4   | 55.4   |  |  |      | 55.5  |
| 4 <sup>'''</sup> -OCH3 |      |      |  |  |  |      | 60.8   | 60.8   |  |  |      |       |

<sup>a</sup>Spectra in pyding-d5. <sup>b</sup>Spectra in CDCl<sub>3</sub>.
